# Supplementary material for: Fast Isolation of Flavonoids from the Endemic Species Nolana ramosissima I.M. Johnst and Its Endothelium-Independent Relaxation Effect in Rat Aorta
Source: PubMed Central journal article supplement (PMC7036828; doi:10.3390/molecules25030520), 2020-01-24

**Table S1.** UHPLC-DAD-MS identification of metabolites in *N. ramosissima* polar extracts.

| Peak # | RT (min.) | UV max (nm) | Tentative identification                                            | Elemental composition [M-H] <sup>-</sup>                     | Theoretical mass (m/z) | Measured mass (m/z) | Accuracy (δ ppm) | Type of compound    | MS <sup>n</sup> ions                                                                                                                                      | Extract |
|--------|-----------|-------------|---------------------------------------------------------------------|--------------------------------------------------------------|------------------------|---------------------|------------------|---------------------|-----------------------------------------------------------------------------------------------------------------------------------------------------------|---------|
| 1      | 1.75      | -           | 2,4,5,6,7-Pentahydroxypentanoic acid                                | C <sub>7</sub> H <sub>13</sub> O <sub>7</sub> <sup>-</sup>   | 209.06668              | 209.06636           | -1.53            | Organic acid        | 191.05553 (C <sub>7</sub> H <sub>11</sub> O <sub>6</sub> <sup>-</sup> )<br>Quinic acid                                                                    | Me, Aq  |
| 2      | 1.95      | 230-346     | Sculetin-5-hydroxyl-7-methoxyl-6- <i>O</i> -glucoside               | C <sub>18</sub> H <sub>17</sub> O <sub>9</sub> <sup>-</sup>  | 377.08781              | 377.08542           | -6.33            | Coumarin            |                                                                                                                                                           | Me, Aq  |
| 3      | 3.61      | 230-346     | Sculetin-6- <i>O</i> -glucoside (esculine)                          | C <sub>15</sub> H <sub>15</sub> O <sub>9</sub> <sup>-</sup>  | 339.07216              | 339.07178           | -1.12            | Coumarin glucoside  | 177.01874 (C <sub>9</sub> H <sub>5</sub> O <sub>4</sub> <sup>-</sup> ) sculetin<br>133.02873 (C <sub>8</sub> H <sub>5</sub> O <sub>2</sub> <sup>-</sup> ) | Aq      |
| 4      | 4.25      | 287         | 7-Methoxy-3-glucosyl flavanone                                      | C <sub>22</sub> H <sub>23</sub> O <sub>10</sub> <sup>-</sup> | 447.12967              | 447.12811           | -3.48            | Flavanone           |                                                                                                                                                           | Me      |
| 5      | 5.60      | 245         | 2,4-Dihydroxybenzoic acid                                           | C <sub>7</sub> H <sub>5</sub> O <sub>4</sub> <sup>-</sup>    | 153.01933              | 153.01881           | -3.39            | Organic acid        | 108.02066 (C <sub>7</sub> H <sub>5</sub> O <sub>2</sub> <sup>-</sup> , M-CO <sub>2</sub> )                                                                | Me, Aq  |
| 6      | 6.28      | 230-346     | 5-Hydroxy-7-methoxyesculin                                          | C <sub>16</sub> H <sub>17</sub> O <sub>10</sub> <sup>-</sup> | 369.08272              | 369.08267           | 0.13             | Coumarin glucoside  | 160.02374 (C <sub>9</sub> H <sub>5</sub> O <sub>3</sub> <sup>-</sup> ) umbelliferone                                                                      | Me      |
| 7      | 7.82      | 287         | Naringenin-4',7-dimethoxyl-3- <i>O</i> -rhamnoside                  | C <sub>23</sub> H <sub>25</sub> O <sub>10</sub> <sup>-</sup> | 461.14532              | 461.14371           | 3.49             | Flavanone glycoside |                                                                                                                                                           | Me      |
| 8      | 8.25      | 234-303     | Salicylic acid*                                                     | C <sub>7</sub> H <sub>5</sub> O <sub>3</sub> <sup>-</sup>    | 137.02442              | 137.02391           | -3.72            | Organic acid        | 108.02066 (C <sub>7</sub> H <sub>5</sub> O <sub>2</sub> <sup>-</sup> , M-CO <sub>2</sub> )                                                                | Me, Aq  |
| 9      | 9.21      | 287         | Naringenin 4'-acetyl-7-methoxyl-3- <i>O</i> -rhamnoside             | C <sub>24</sub> H <sub>25</sub> O <sub>11</sub> <sup>-</sup> | 489.14024              | 489.13876           | -3.02            | Flavanone glycoside |                                                                                                                                                           | Me, Aq  |
| 10     | 9.43      | 310         | Caffeic acid*                                                       | C <sub>9</sub> H <sub>7</sub> O <sub>4</sub> <sup>-</sup>    | 179.03498              | 179.03497           | -0.05            | Organic acid        | 135.0439 (C <sub>8</sub> H <sub>7</sub> O <sub>2</sub> <sup>-</sup> , M-CO <sub>2</sub> )                                                                 | Me      |
| 11     | 9.52      | 285         | Eriodictyol 5-acetyl-3',4'-dimethoxyl-7- <i>O</i> -glucoside        | C <sub>25</sub> H <sub>27</sub> O <sub>11</sub> <sup>-</sup> | 503.15589              | 503.15442           | 2.92             | Flavanone glycoside |                                                                                                                                                           | Me      |
| 12     | 9.92      | 255-355     | Quercetin-3- <i>O</i> -rutinoside*                                  | C <sub>27</sub> H <sub>29</sub> O <sub>16</sub> <sup>-</sup> | 609.14611              | 609.14606           | -8.13            | Flavonol glycoside  | 271.02475 C <sub>14</sub> H <sub>7</sub> O <sub>6</sub> <sup>-</sup>                                                                                      | Me, Aq  |
| 13     | 10.01     | 264-364     | Kaempferol- 3-rutenoside                                            | C <sub>27</sub> H <sub>29</sub> O <sub>15</sub> <sup>-</sup> | 593.15112              | 593.15119           | 0.11             | Flavonol glycoside  | 271.02475 C <sub>14</sub> H <sub>7</sub> O <sub>6</sub> <sup>-</sup>                                                                                      | Me, Aq  |
| 14     | 10.18     | 220         | 9,10-dihydroxy-6-oxodecanoic acid                                   | C <sub>10</sub> H <sub>17</sub> O <sub>5</sub> <sup>-</sup>  | 217.10815              | 217.10805           | -9.9             | Fatty acid          | 109.02821 C <sub>6</sub> H <sub>6</sub> O <sub>2</sub> <sup>-</sup>                                                                                       | Me, Aq  |
| 15     | 10.36     | 287         | Naringenin 3-hydroxyl-8-(3-methyl-2-butenyl) 7- <i>O</i> -glucoside | C <sub>26</sub> H <sub>29</sub> O <sub>11</sub> <sup>-</sup> | 517.17154              | 517.17004           | -2.9             | Flavanone-glucoside |                                                                                                                                                           | Me, Aq  |

|    |       |         |                                                                      |                                                              |           |           |       |                      |                                                                         |        |
|----|-------|---------|----------------------------------------------------------------------|--------------------------------------------------------------|-----------|-----------|-------|----------------------|-------------------------------------------------------------------------|--------|
| 16 | 10.88 | 227     | Trihydroxy-octadecadienoic acid                                      | C <sub>18</sub> H <sub>31</sub> O <sub>5</sub> <sup>-</sup>  | 343.21261 | 343.21320 | 1.71  | Oxipilin             |                                                                         | Me, Aq |
| 17 | 10.96 | 287     | Naringenin 3-Hydroxyl-4'-methoxyl-8-(3-methyl-2-butenyl) 7-glucoside | C <sub>27</sub> H <sub>31</sub> O <sub>11</sub> <sup>-</sup> | 531.18719 | 531.18567 | -2.86 | Flavanone-glucoside  |                                                                         | Me     |
| 18 | 11.48 | 230-346 | Scopoletin*                                                          | C <sub>10</sub> H <sub>7</sub> O <sub>4</sub> <sup>-</sup>   | 191.03498 | 191.03490 | -0.41 | Coumarin             |                                                                         | Me, Aq |
| 19 | 11.96 | 255-355 | Isorhamnetin- 3-rutinoside                                           | C <sub>28</sub> H <sub>31</sub> O <sub>16</sub> <sup>-</sup> | 623.16176 | 623.16132 | -0.70 | Flavonol glycoside   | 255.02950<br>C <sub>14</sub> H <sub>7</sub> O <sub>5</sub> <sup>-</sup> | Me, Aq |
| 20 | 12.16 | 220     | 10-Hydroxy-6-oxodecanoic acid                                        | C <sub>10</sub> H <sub>17</sub> O <sub>4</sub> <sup>-</sup>  | 201.11323 | 201.11302 | -1.04 | Fatty acid           |                                                                         | Me, Aq |
| 21 | 12.26 | 287     | Naringenin 3,4'-Dimethoxyl-8-(3-methyl-2-butenyl) 7-O-glucoside      | C <sub>28</sub> H <sub>33</sub> O <sub>11</sub> <sup>-</sup> | 545.20284 | 545.20111 | -10   | Flavanone-glucoside  |                                                                         | Me     |
| 22 | 12.32 | 287     | 3,5-Dihydroxy- 7-Methoxyflavanone                                    | C <sub>16</sub> H <sub>13</sub> O <sub>5</sub> <sup>-</sup>  | 285.07685 | 285.07727 | 1.47  | Flavanone            | 252.04295<br>C <sub>15</sub> H <sub>8</sub> O <sub>4</sub> <sup>-</sup> | Me, Aq |
| 23 | 12.76 | 255-355 | Quercetin-3-O-glucoside                                              | C <sub>27</sub> H <sub>29</sub> O <sub>16</sub> <sup>-</sup> | 463.08820 | 463.08847 | 0.58  | Flavonol glicosidado | 271.02460<br>C <sub>14</sub> H <sub>7</sub> O <sub>6</sub> <sup>-</sup> | Me, Aq |
| 24 | 12.84 | 227     | Trihydroxy-octadecadienoic acid                                      | C <sub>18</sub> H <sub>31</sub> O <sub>5</sub> <sup>-</sup>  | 327.21770 | 327.21817 | 1.43  | Oxilipin             |                                                                         | Me, Aq |
| 25 | 13.36 | 227     | Dihydroxy-octadecadienoic acid-O-glucoside                           | C <sub>24</sub> H <sub>41</sub> O <sub>10</sub> <sup>-</sup> | 489.27052 | 489.27121 | 1.41  | Oxipilin             |                                                                         | Me, Aq |
| 26 | 13.50 | 220     | Trihydroxy-octadecaenoic acid                                        | C <sub>18</sub> H <sub>33</sub> O <sub>5</sub> <sup>-</sup>  | 329.23335 | 329.23386 | 1.09  | Oxilipin             |                                                                         | Me, Aq |
| 27 | 13.86 | 220     | 9,10-Tetradecanoic acid                                              | C <sub>14</sub> H <sub>27</sub> O <sub>4</sub> <sup>-</sup>  | 259.19148 | 259.19177 | 1.11  | Oxilipin             |                                                                         | Aq     |
| 28 | 14.15 | 220     | 9,10-Dihydroxy-hexadecanoic acid                                     | C <sub>16</sub> H <sub>31</sub> O <sub>4</sub> <sup>-</sup>  | 287.22278 | 287.22321 | 1.49  | Oxilipin             |                                                                         | Me, Aq |
| 29 | 14.36 | 227     | Trihydroxy-octadecaenoic acid isomer                                 | C <sub>18</sub> H <sub>33</sub> O <sub>5</sub> <sup>-</sup>  | 329,23335 | 329.23392 | 1.73  | Oxilipin             |                                                                         | Me, Aq |
| 30 | 14.52 | 255-355 | 7,3'-Dimethoxyquercetin                                              | C <sub>17</sub> H <sub>13</sub> O <sub>7</sub> <sup>-</sup>  | 329.06668 | 329.06680 | 0.36  | Flavonol             |                                                                         | Aq     |
| 31 | 14.85 | -       | Miristic acid-11-O-glucoside                                         | C <sub>20</sub> H <sub>37</sub> O <sub>8</sub> <sup>-</sup>  | 405.24939 | 405.25012 | 2.49  | Fatty acid           |                                                                         | Me     |
| 32 | 15.75 | 287     | 5,7-Dihydroxyflavanone                                               | C <sub>15</sub> H <sub>11</sub> O <sub>4</sub> <sup>-</sup>  | 255.06628 | 255.06656 | 1.09  | Flavanone            | 240.04242<br>C <sub>14</sub> H <sub>8</sub> O <sub>4</sub> <sup>-</sup> | Me     |
| 33 | 15.82 | 220     | Hydroxy-eicosaenoic acid glucoside                                   | C <sub>26</sub> H <sub>47</sub> O <sub>9</sub> <sup>-</sup>  | 503.32256 | 503.32269 | 0.26  | Oxilipin glucoside   |                                                                         | Me     |
| 34 | 15.92 | 227     | Hydroxy-hexadecaenoic acid-O-glucoside                               | C <sub>22</sub> H <sub>39</sub> O <sub>9</sub> <sup>-</sup>  | 447.26022 | 447.25996 | 0.58  | Oxilipin glucoside   |                                                                         | Me     |
| 35 | 16.26 | 227     | Dihydroxy-octadecadienoic acid -O-glucoside                          | C <sub>24</sub> H <sub>41</sub> O <sub>10</sub> <sup>-</sup> | 489.27052 | 489.27121 | 1.41  | Oxipilin             |                                                                         | Me, Aq |
| 36 | 16.58 | 220     | hydroxy-eicosaenoic acid glucoside                                   | C <sub>26</sub> H <sub>45</sub> O <sub>9</sub> <sup>-</sup>  | 501.30691 | 501.30719 | 0.56  | Oxilipin glucoside   |                                                                         | Me, Aq |

|    |       |          |                                            |                                                             |           |           |       |           |                                                                           |        |
|----|-------|----------|--------------------------------------------|-------------------------------------------------------------|-----------|-----------|-------|-----------|---------------------------------------------------------------------------|--------|
| 37 | 17.20 | 227      | Dihydroxy-octadecadienoic acid             | C <sub>18</sub> H <sub>31</sub> O <sub>4</sub> <sup>-</sup> | 311.22278 | 311.22330 | 1.67  | Oxipilin  |                                                                           | Me, Aq |
| 38 | 17.51 | 287      | Dihydroxyflavanone isomer                  | C <sub>15</sub> H <sub>11</sub> O <sub>4</sub> <sup>-</sup> | 255.06628 | 255.06612 | -0.63 | Flavanone | 151.00296<br>C <sub>7</sub> H <sub>5</sub> O <sub>4</sub> <sup>-</sup>    | Aq     |
| 39 | 18.00 | 269-337  | 7-Methoxyapigenin                          | C <sub>16</sub> H <sub>11</sub> O <sub>5</sub> <sup>-</sup> | 283.06120 | 283.06158 | 0.23  | Flavone   | 239.03494<br>C <sub>14</sub> H <sub>7</sub> O <sub>4</sub> <sup>-</sup>   | Me, Aq |
| 40 | 18.32 | 255-355  | 5,7-Dihydroxyflavone                       | C <sub>15</sub> H <sub>9</sub> O <sub>4</sub> <sup>-</sup>  | 253.05063 | 253.05040 | 0.91  | Flavone   | 209.06020<br>C <sub>14</sub> H <sub>9</sub> O <sub>2</sub> <sup>-</sup>   | Me, Aq |
| 41 | 18.46 | 255-355  | 5-Hydroxy-3,4',7-trimethoxyflavone         | C <sub>18</sub> H <sub>15</sub> O <sub>6</sub> <sup>-</sup> | 327.0874  | 327.0874  | 0     | Flavone   |                                                                           | Me, Aq |
| 42 | 18.91 | 260-355  | Kaempferol 7,4'-dimethyl ether             | C <sub>17</sub> H <sub>13</sub> O <sub>6</sub> <sup>-</sup> | 313.07176 | 313.07190 | 0.45  | Flavonol  | 253.05074<br>C <sub>15</sub> H <sub>9</sub> O <sub>4</sub> <sup>-</sup>   | Me     |
| 43 | 19.42 | 269- 337 | 7,4'-Dimethoxyapigenin                     | C <sub>17</sub> H <sub>13</sub> O <sub>5</sub> <sup>-</sup> | 297.07685 | 297.07687 | -0.07 | Flavone   | 225.05515<br>C <sub>14</sub> H <sub>9</sub> O <sub>3</sub> <sup>-</sup>   | Me, Aq |
| 44 | 19.75 | 255-355  | Quercetin*                                 | C <sub>15</sub> H <sub>9</sub> O <sub>7</sub> <sup>-</sup>  | 301.03538 | 301.03546 | -0.36 | Flavonol  | 151.00307<br>(C <sub>7</sub> H <sub>5</sub> O <sub>4</sub> <sup>-</sup> ) | Me, Aq |
| 45 | 20.98 | 220      | Hydroxy-docosanoic acid                    | C <sub>22</sub> H <sub>43</sub> O <sub>3</sub> <sup>-</sup> | 355.32177 | 355.32230 | -1.49 | Oxipilin  |                                                                           | Aq     |
| 46 | 19.95 | 285      | 3,5-Dihydroxy-7-methoxyflavanone           | C <sub>16</sub> H <sub>13</sub> O <sub>5</sub> <sup>-</sup> | 285.07685 | 285.07687 | -0.07 | Flavanone | 252.04295<br>C <sub>13</sub> H <sub>8</sub> O <sub>4</sub> <sup>-</sup>   | Me     |
| 47 | 20.32 | 287      | 3-Acetyl-5-hydroxy-7-methoxyflavanone      | C <sub>18</sub> H <sub>15</sub> O <sub>6</sub> <sup>-</sup> | 327.0874  | 327.0874  | 0     | Flavanone |                                                                           | Me     |
| 48 | 20.52 | 287      | 5,3'-Dihydroxy-4', 7-dimethoxyflavanone    | C <sub>17</sub> H <sub>15</sub> O <sub>6</sub> <sup>-</sup> | 315.08741 | 315.08743 | 0.12  | Flavanone |                                                                           | Me, Aq |
| 49 | 20.76 | 284      | 5-Hydroxy-7-methoxyflavanone (pinostrobin) | C <sub>16</sub> H <sub>13</sub> O <sub>4</sub> <sup>-</sup> | 269.08193 | 269.08188 | 0.19  | Flavanone | 165.01819<br>C <sub>8</sub> H <sub>5</sub> O <sub>4</sub> <sup>-</sup>    | Me, Aq |
| 50 | 19.86 | 269- 337 | Apigenin*                                  | C <sub>15</sub> H <sub>9</sub> O <sub>5</sub> <sup>-</sup>  | 269.04555 | 269.04556 | -0.04 | Flavone   |                                                                           | Me, Aq |
| 51 | 21.32 | 220      | Dihydroxy-octadecanoic acid                | C <sub>18</sub> H <sub>35</sub> O <sub>4</sub> <sup>-</sup> | 315.25408 | 315.25458 | -1.40 | Oxipilin  |                                                                           | Me, Aq |
| 52 | 22.01 | 232      | Tetrahydroxy-eicosatrienoic acid           | C <sub>20</sub> H <sub>33</sub> O <sub>6</sub> <sup>-</sup> | 369.22826 | 369.22864 | -1.03 | Oxipilin  |                                                                           | Me, Aq |
| 53 | 22.54 | 227      | Tetrahydroxy-eicosadienoic acid            | C <sub>20</sub> H <sub>35</sub> O <sub>6</sub> <sup>-</sup> | 371.24391 | 371.24423 | -0.86 | Oxipilin  |                                                                           | Me     |
| 54 | 22.97 | 220      | Trihydroxy-octadecenoic acid isomer        | C <sub>18</sub> H <sub>33</sub> O <sub>5</sub> <sup>-</sup> | 329.23335 | 329.23358 | -0.70 | Oxipilin  | 135.04440<br>C <sub>8</sub> H <sub>7</sub> O <sub>2</sub> <sup>-</sup>    | Me, Aq |
| 55 | 23.46 | 247      | Tetrahydroxy-eicosatrienoic acid isomer    | C <sub>20</sub> H <sub>33</sub> O <sub>6</sub> <sup>-</sup> | 369.22826 | 369.22861 | -0.95 | Oxipilin  |                                                                           | Me     |
| 56 | 23.47 | 287      | Naringenin*                                | C <sub>15</sub> H <sub>11</sub> O <sub>5</sub> <sup>-</sup> | 271.06120 | 271.06161 | -1.51 | Flavanone | 211.03986<br>C <sub>13</sub> H <sub>7</sub> O <sub>3</sub> <sup>-</sup>   | Me, Aq |
| 57 | 25.50 | 243      | Dihydroxy-octadecatrienoic acid            | C <sub>18</sub> H <sub>29</sub> O <sub>4</sub> <sup>-</sup> | 309.20713 | 309.20761 | -1.55 | Oxipilin  | 237.03978 C <sub>11</sub> H <sub>9</sub> O <sub>6</sub> <sup>-</sup>      | Me, Aq |
| 58 | 26.43 | 220      | Dihydroxy-octadecenoic acid                | C <sub>18</sub> H <sub>33</sub> O <sub>4</sub> <sup>-</sup> | 313.23843 | 313.23889 | 1.46  | Oxipilin  | 237.03978 C <sub>11</sub> H <sub>9</sub> O <sub>6</sub> <sup>-</sup>      | Me     |

|    |       |     |                           |                     |           |           |       |              |        |
|----|-------|-----|---------------------------|---------------------|-----------|-----------|-------|--------------|--------|
| 59 | 26.57 | 220 | Dihydroxy-docosenoic acid | $C_{22}H_{41}O_4^-$ | 369.30103 | 369.30176 | -.197 | Oxipilin     | Me, Aq |
| 60 | 27.12 | -   | Hydroxymiristic acid      | $C_{14}H_{27}O_3^-$ | 243.19657 | 243.19669 | -0.49 | Fatty acid   | Me, Aq |
| 61 | 27.57 | -   | Hydroxypalmitic acid      | $C_{16}H_{31}O_3^-$ | 271.22787 | 271.22769 | 0.66  | Organic acid | Me     |

\*Identified by spiking experiments with authentic standards. Me: methanol, Aq: herbal tea.

**Table S2.** The k values of compounds **1-5** in the diphasic solvent systems n-hexane/EtOAc/MeOH/H<sub>2</sub>O and n-hexane/EtOAc/acetonitrile (measured by UHPLC).

| Solvent system                     | Compounds |          |          |          |          |
|------------------------------------|-----------|----------|----------|----------|----------|
|                                    | <b>1</b>  | <b>2</b> | <b>3</b> | <b>4</b> | <b>5</b> |
| hexane/EtOAc/MeOH/H <sub>2</sub> O | <b>1</b>  | <b>2</b> | <b>3</b> | <b>4</b> | <b>5</b> |
| 5:5:5:5                            | 2.8       | 2.3      | 2.1      | 2.5      | 2.3      |
| 6:1:6:1                            | 1.6       | 1.3      | 1.5      | 1.6      | 1.8      |
| 6:2:6:2                            | 2.0       | 2.4      | 2.0      | 2.6      | 2.9      |
| n-hexane: ethanol: water           | <b>1</b>  | <b>2</b> | <b>3</b> | <b>3</b> | <b>4</b> |
| 7:4:1                              | 0.78      | 1.42     | 1.7      | 1.53     | 1.9      |
| 6:5:1*                             | 0.66      | 0.71     | 0.96     | 0.83     | 1.3      |
| 6:5:2                              | 0.45      | 0.37     | 0.32     | 0.45     | 1.0      |
| n-hexane: methanol                 | <b>1</b>  | <b>2</b> | <b>3</b> | <b>3</b> | <b>4</b> |
| 1:1                                | 1.9       | 3.0      | 2.2      | 1.6      | 3.2      |

\*: selected solvent system.

**Figure S1.** Quattro MK-7 HSCCC system, equipped with two HPLC pumps, UV detector and fraction collector.

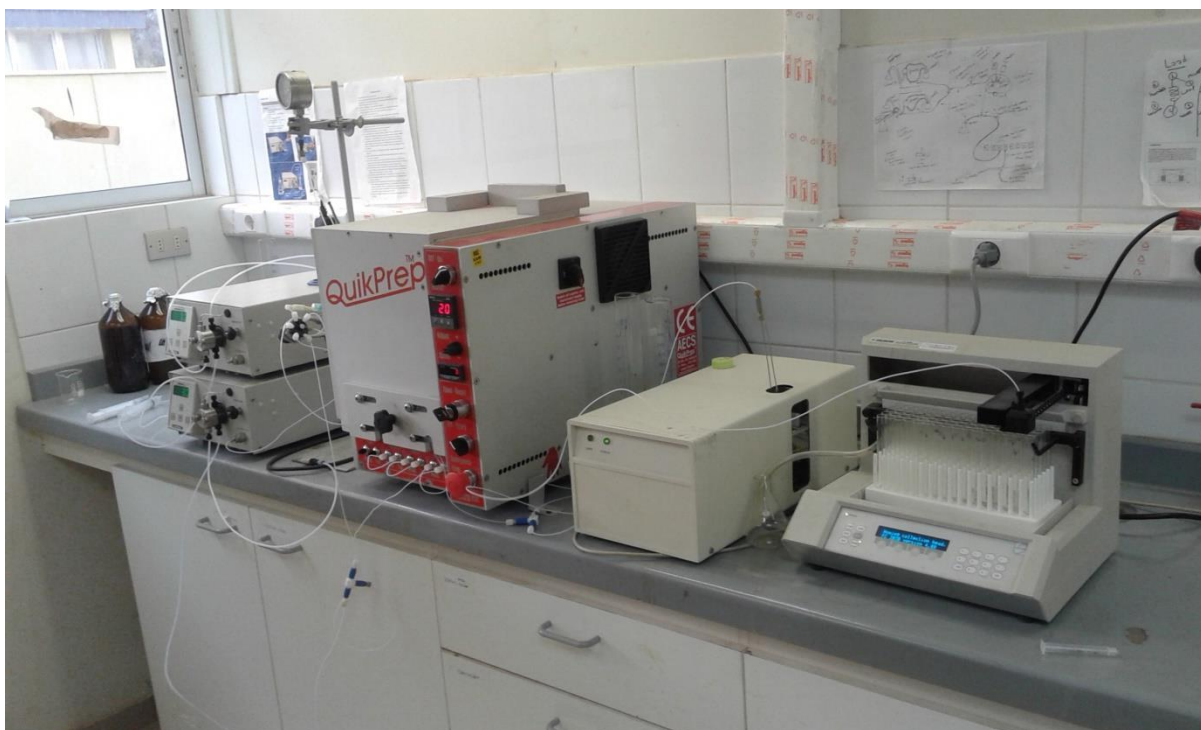

**Figure S2.** HSCCC chromatogram at 280 nm of *N. ramossisima* methanol extract.

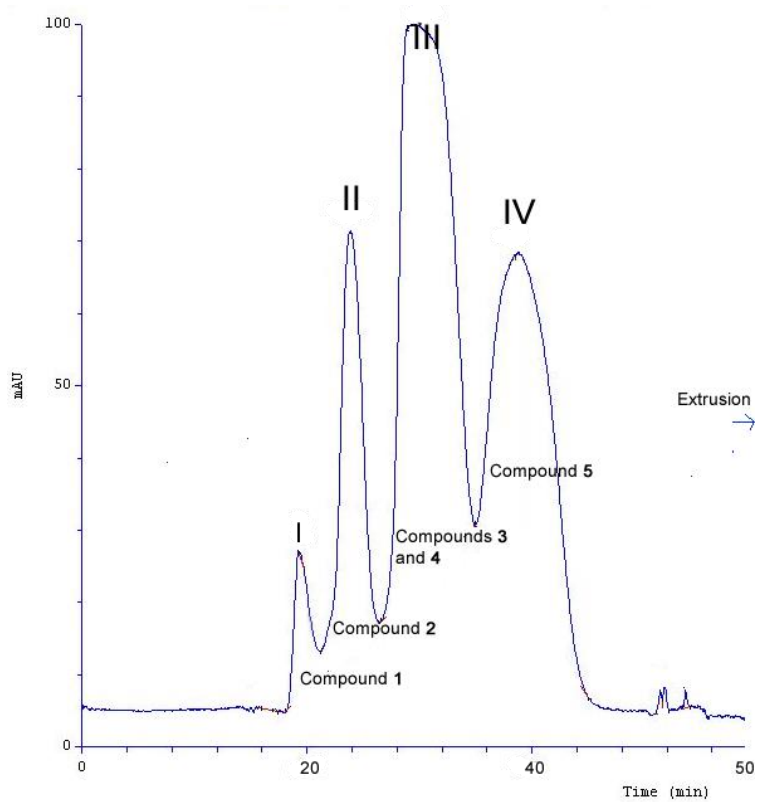

**Figure S3.** TLC plate (Silica gel F<sup>254</sup>, developed with n-hexane:ethyl acetate 8:2 v/v and revealed with p-anisaldehyde-sulfuric acid and heating) of the HSCCC fractions from *N. ramosissima* methanol extract. (Only UV visible compounds 1-5 in elution mode).

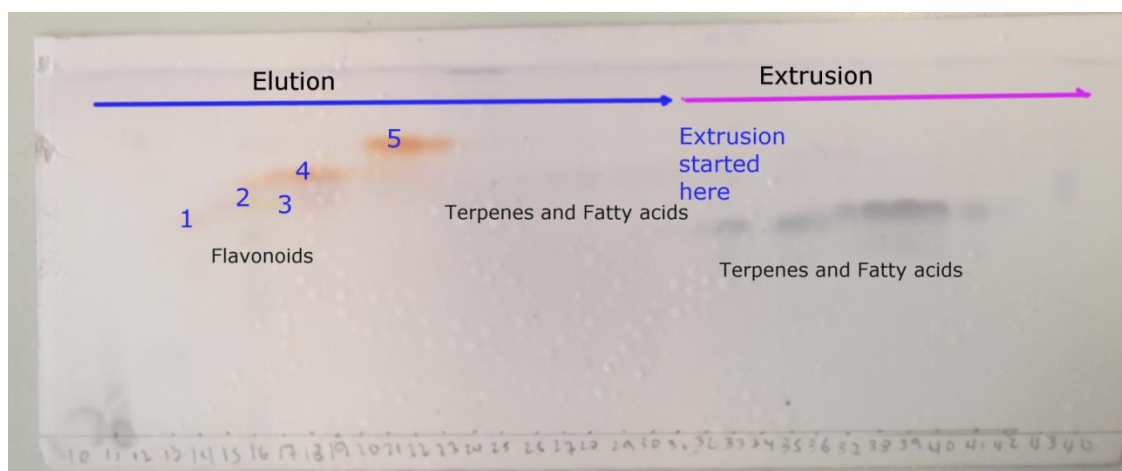



Figure S4. <sup>1</sup>H NMR (300 MHz) spectrum of Compound 1, peak 22, 3,5-dihydroxy-7-methoxyflavanone.

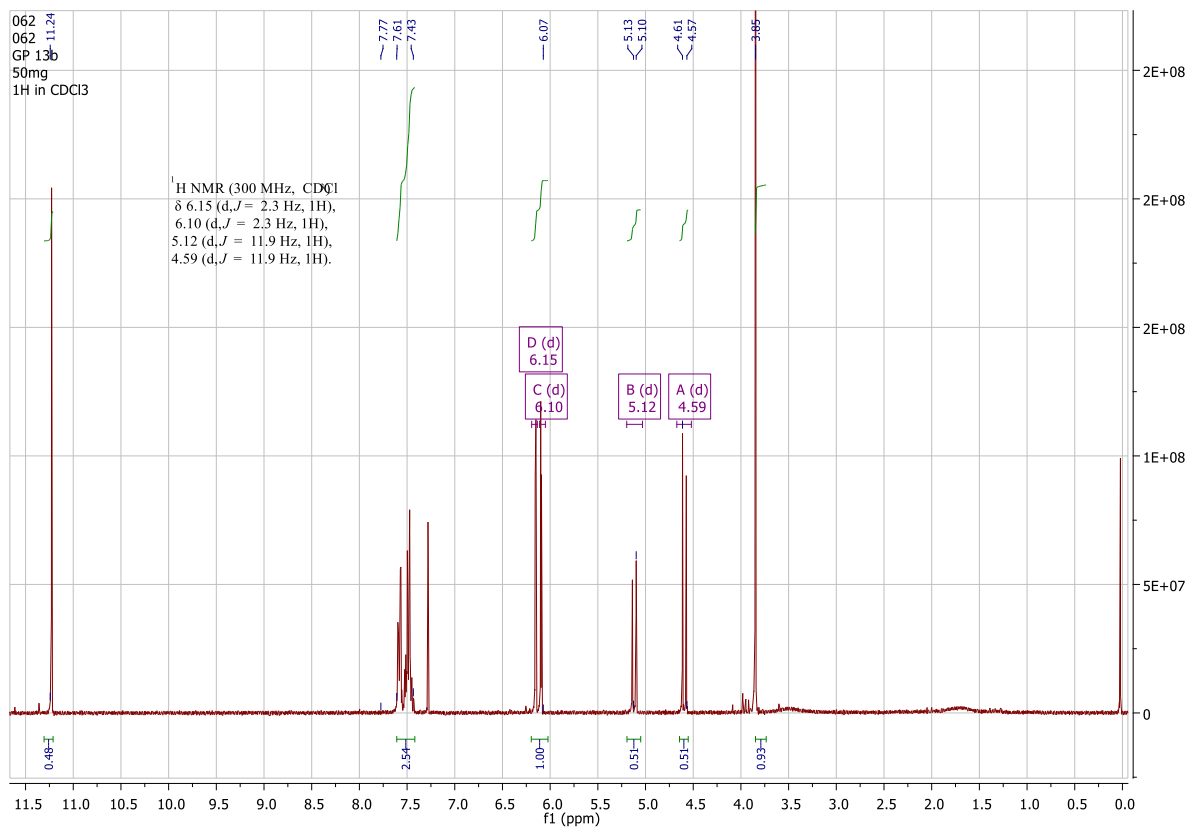

Figure S5. <sup>1</sup>H NMR (300 MHz) spectrum of Compound 1, peak 22, 3,5-dihydroxy-7-methoxyflavanone. (Ampliation).

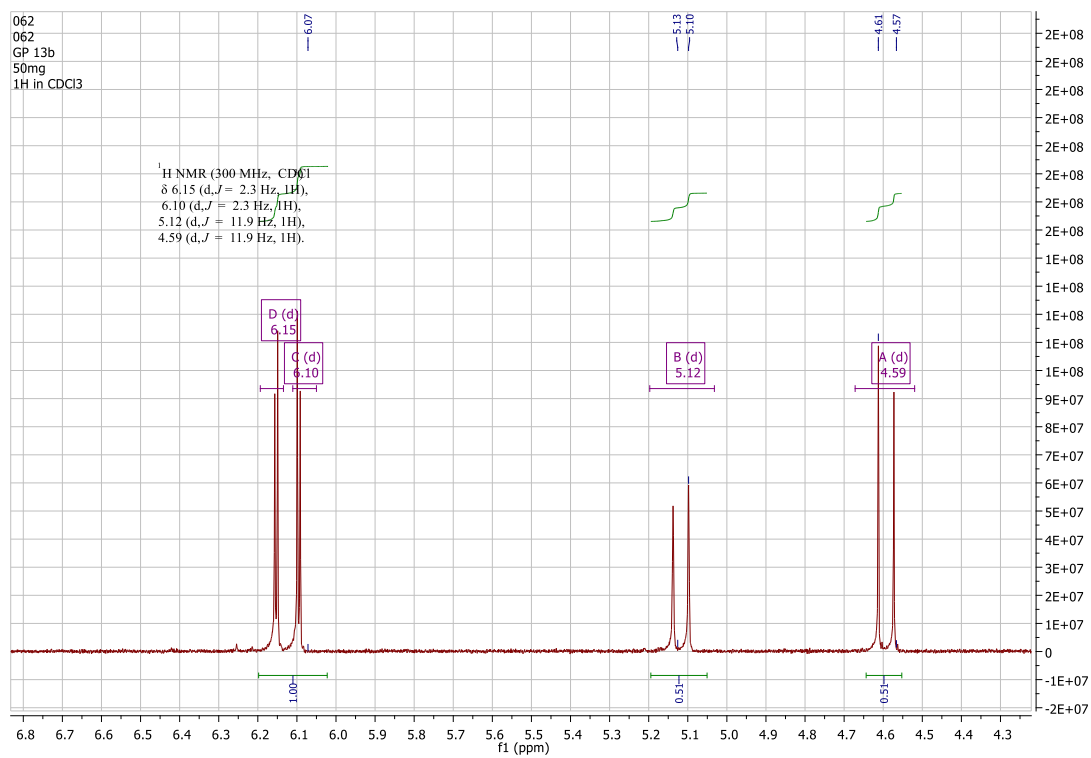

Figure S6.  $^1\text{H}$ - $^1\text{H}$ -COSY NMR spectrum (300 MHz) of Compound 1, peak 22, 3,5-dihydroxy-7methoxyflavanone.

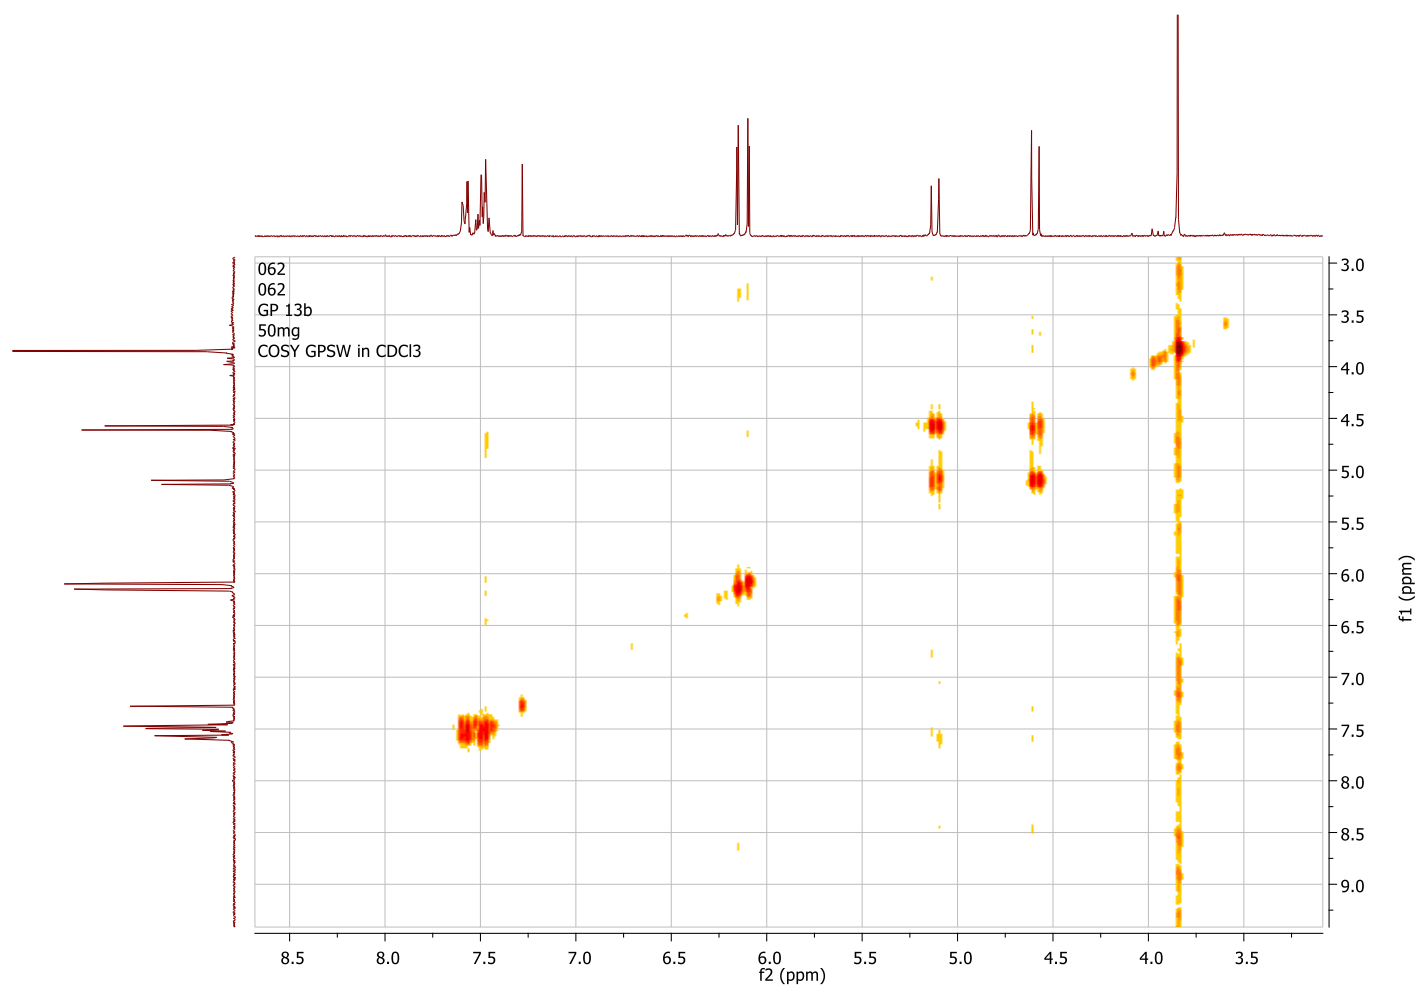

Figure S7.  $^{13}\text{C}$  NMR spectrum (150.09 MHz) of Compound 1, peak 22, 3,5-dihydroxy-7methoxyflavanone.

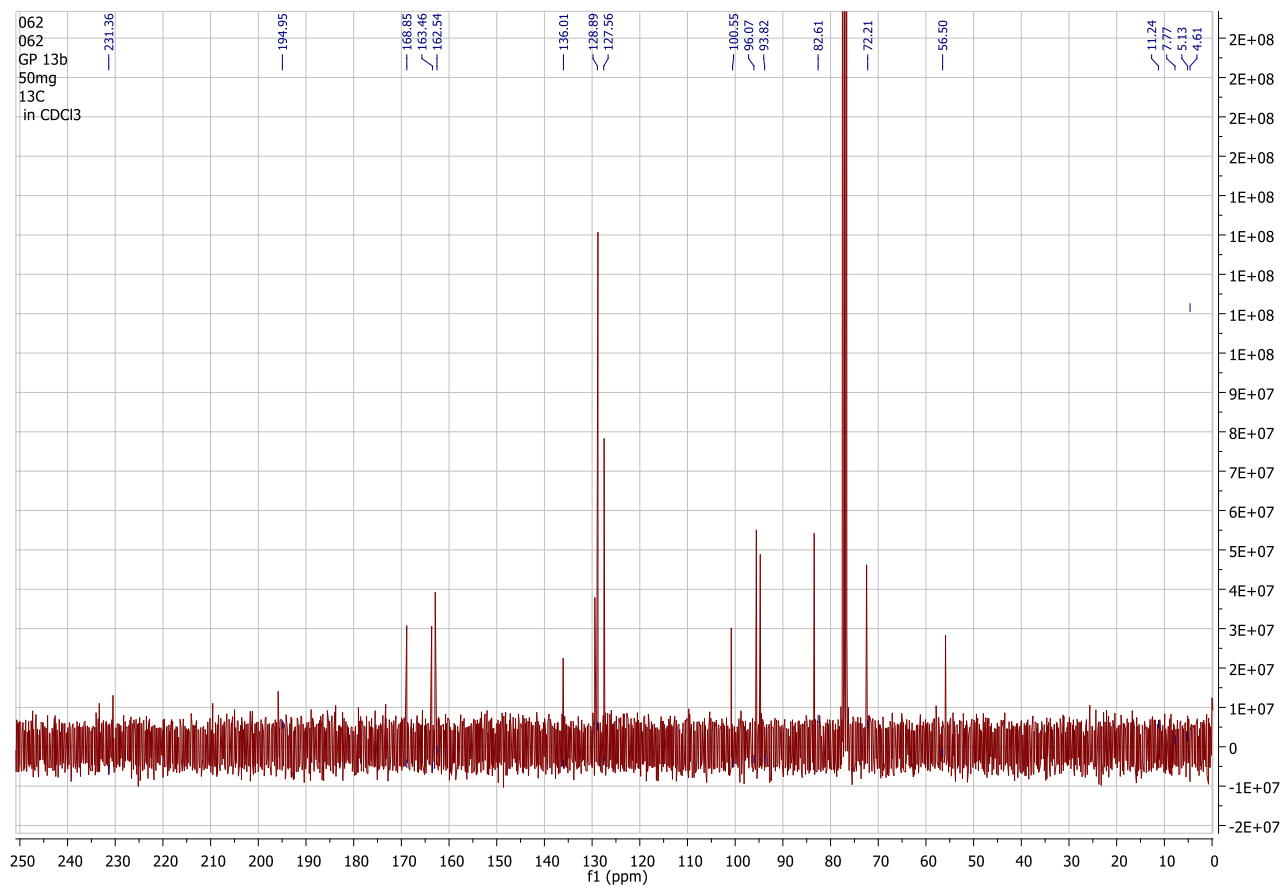

Figure S8. DEPT 135 NMR spectrum (150.09 MHz) of Compound 1, peak 22, 3,5-dihydroxy-7-methoxyflavanone.

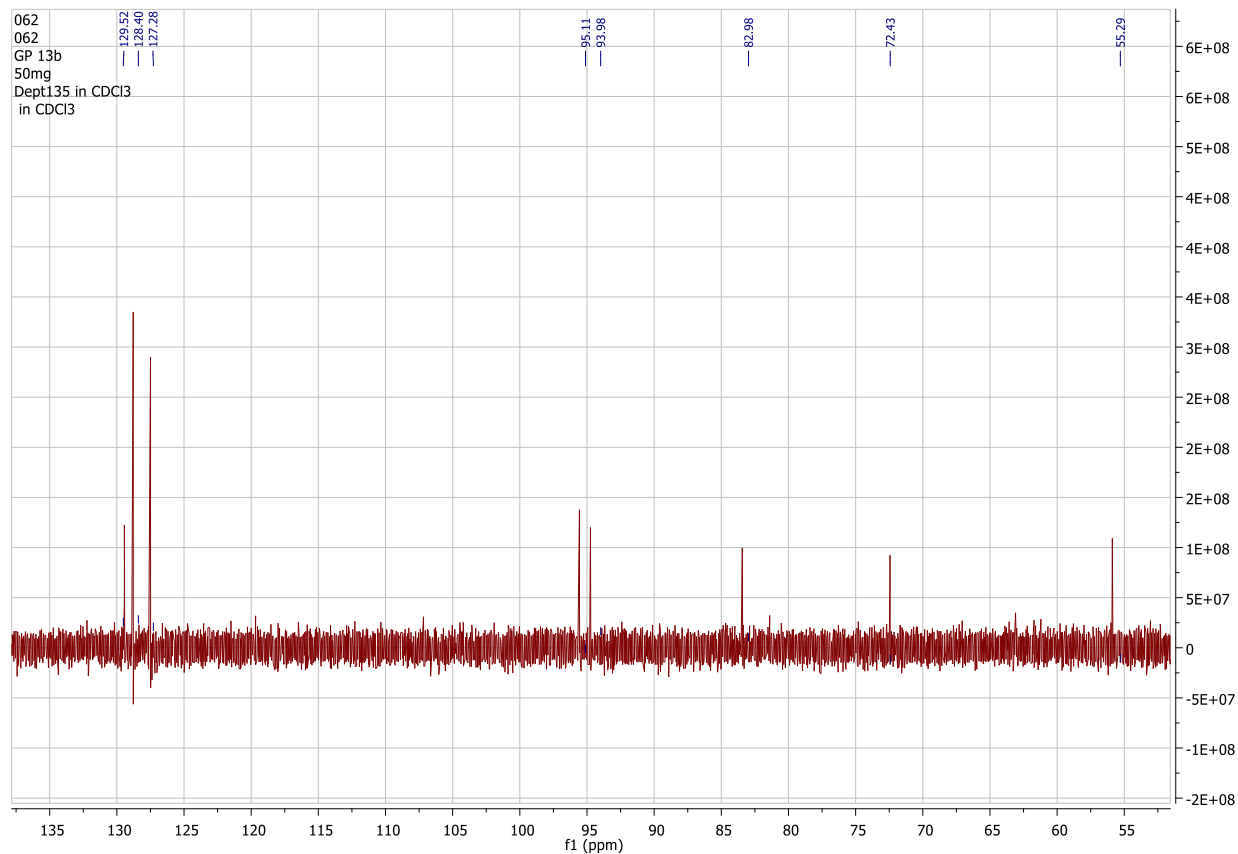

**Figure S9.** HMBC NMR spectrum (300 and 150.09 MHz) of Compound 1, peak 22, 3,5 dihydroxy-7methoxyflavanone.

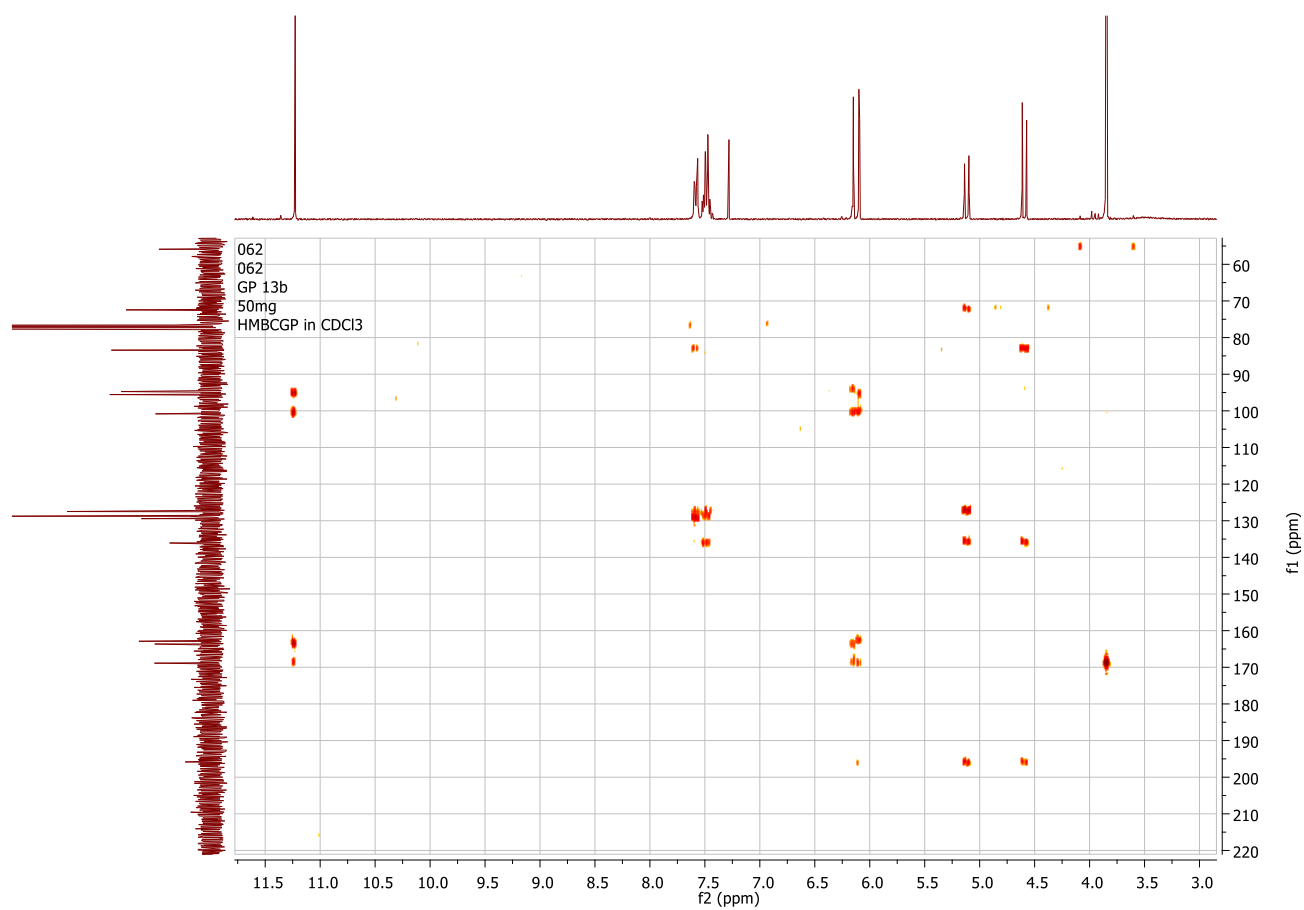

Figure S10. <sup>1</sup>H NMR (300 MHz) spectrum of Compound 2, peak 48, 5,3'-dihydroxy-4',7-dimethoxyflavanone.

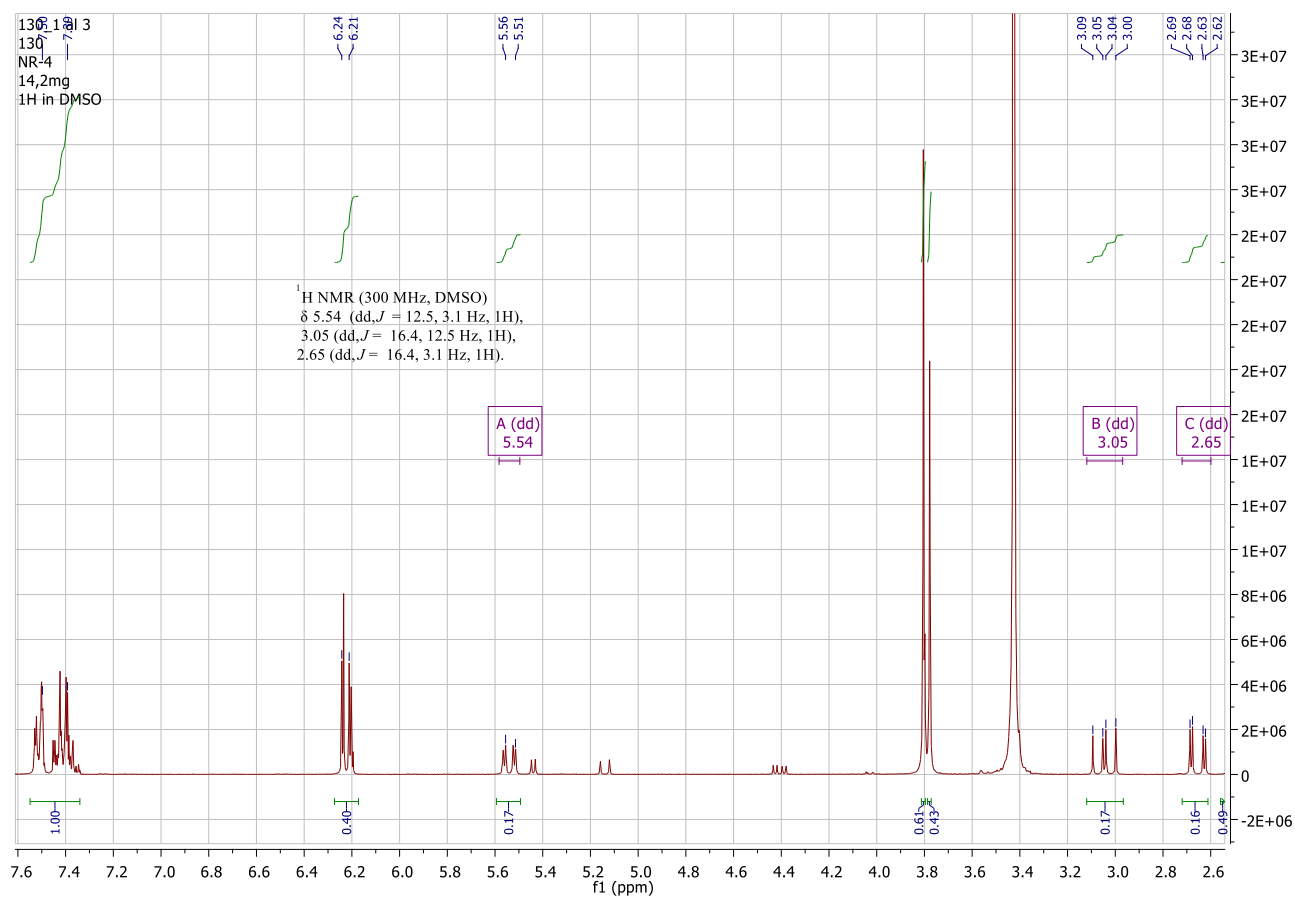

**Figure S11.**  $^{13}\text{C}$  NMR spectrum (150.09 MHz) of Compound 2, peak 48, 5,3'-dihydroxy-4',7-dimethoxyflavanone.

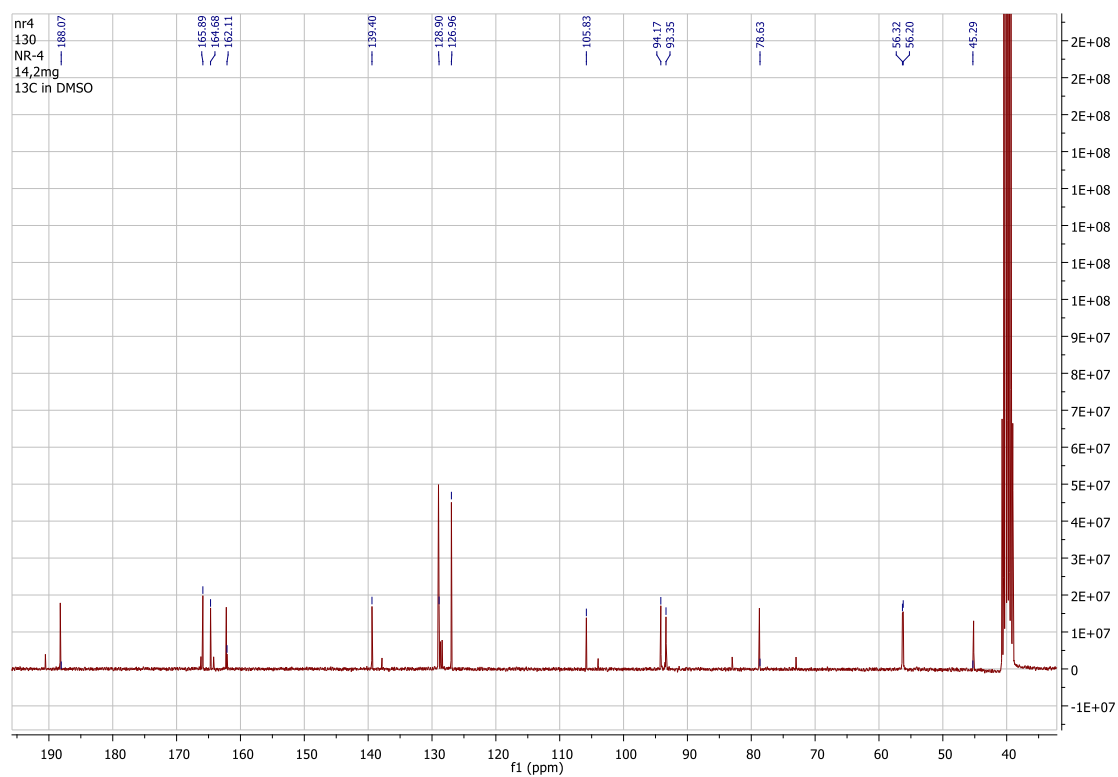



Figure S12. DEPT 135 NMR spectrum (150.09 MHz) of Compound 2, peak 48, 5,3'-dihydroxy-4',7-dimethoxyflavanone.

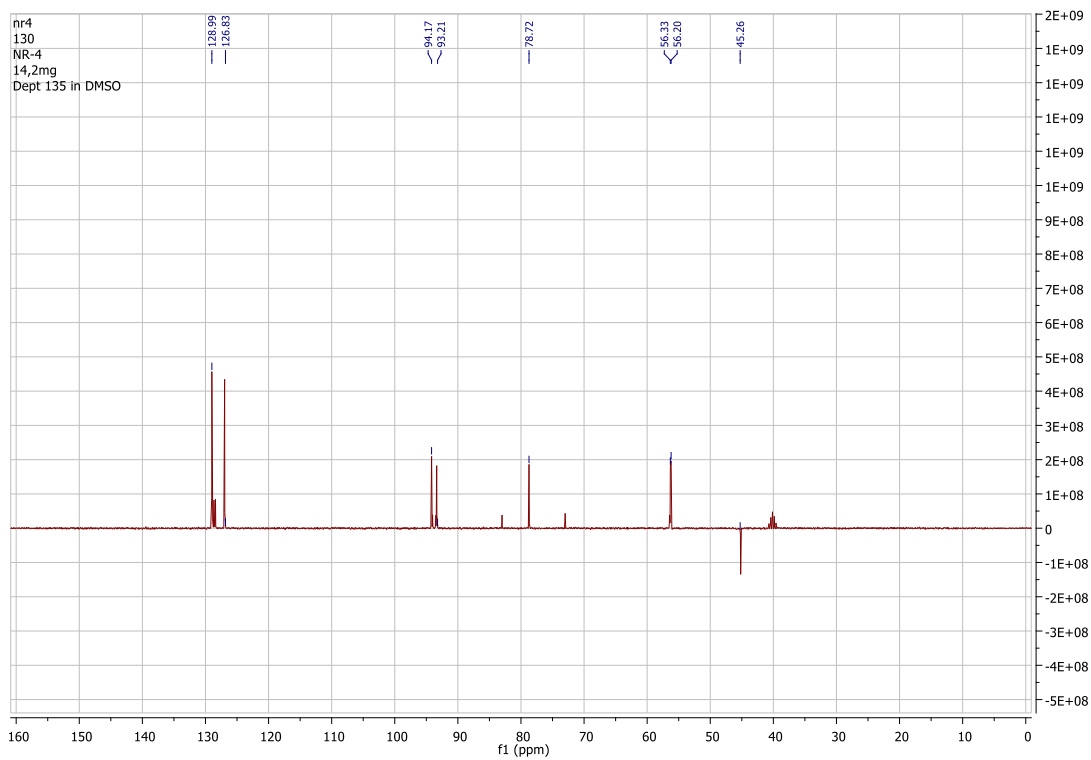

Figure S13.  $^1\text{H}$ - $^1\text{H}$ -COSY NMR spectrum (300 MHz) of Compound 2, peak 48, 5,3'-dihydroxy-4',7-dimethoxyflavanone.

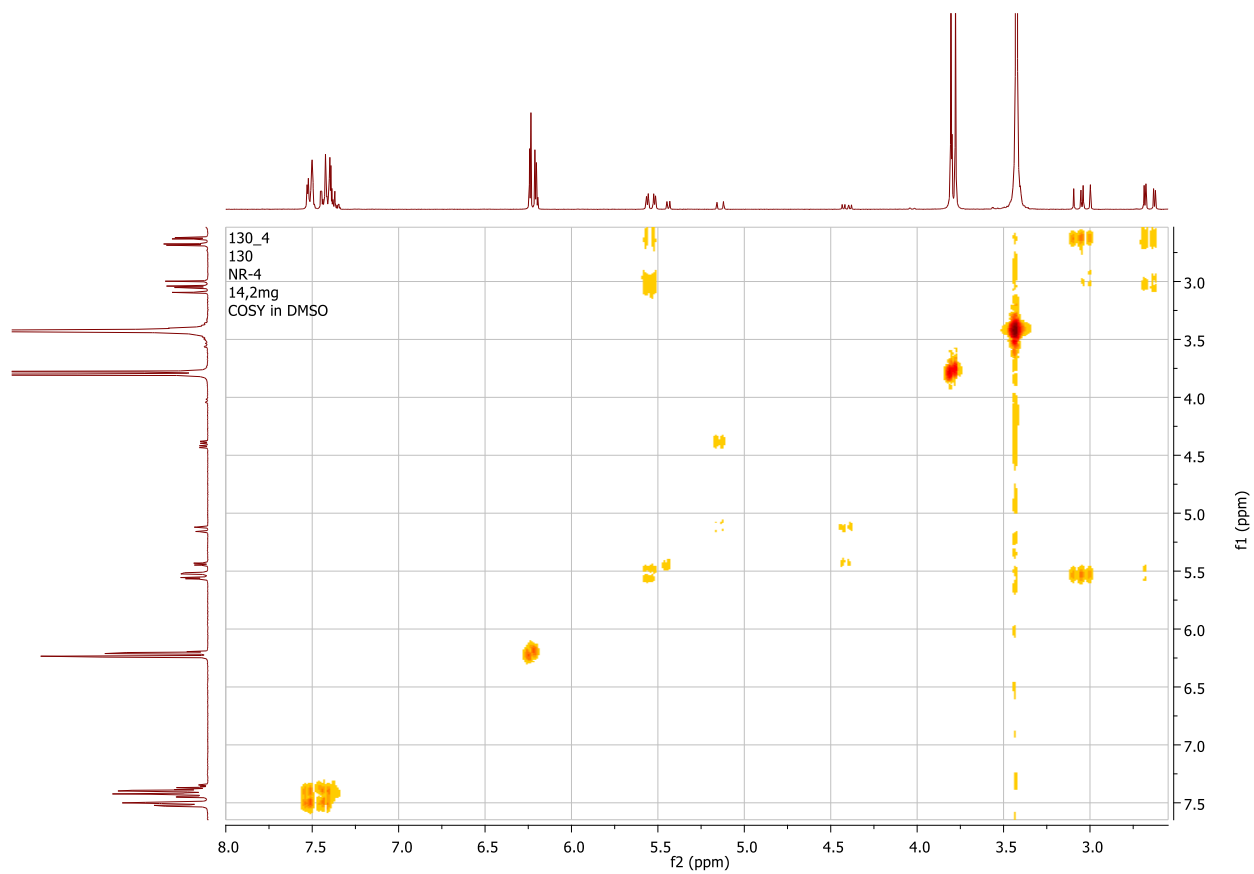

**Figure S14.** Phase edited HSQC NMR spectrum (300 and 150.09 MHz) of Compound 2, peak 48, 5,3'-dihydroxy-4', 7-dimethoxyflavanone.

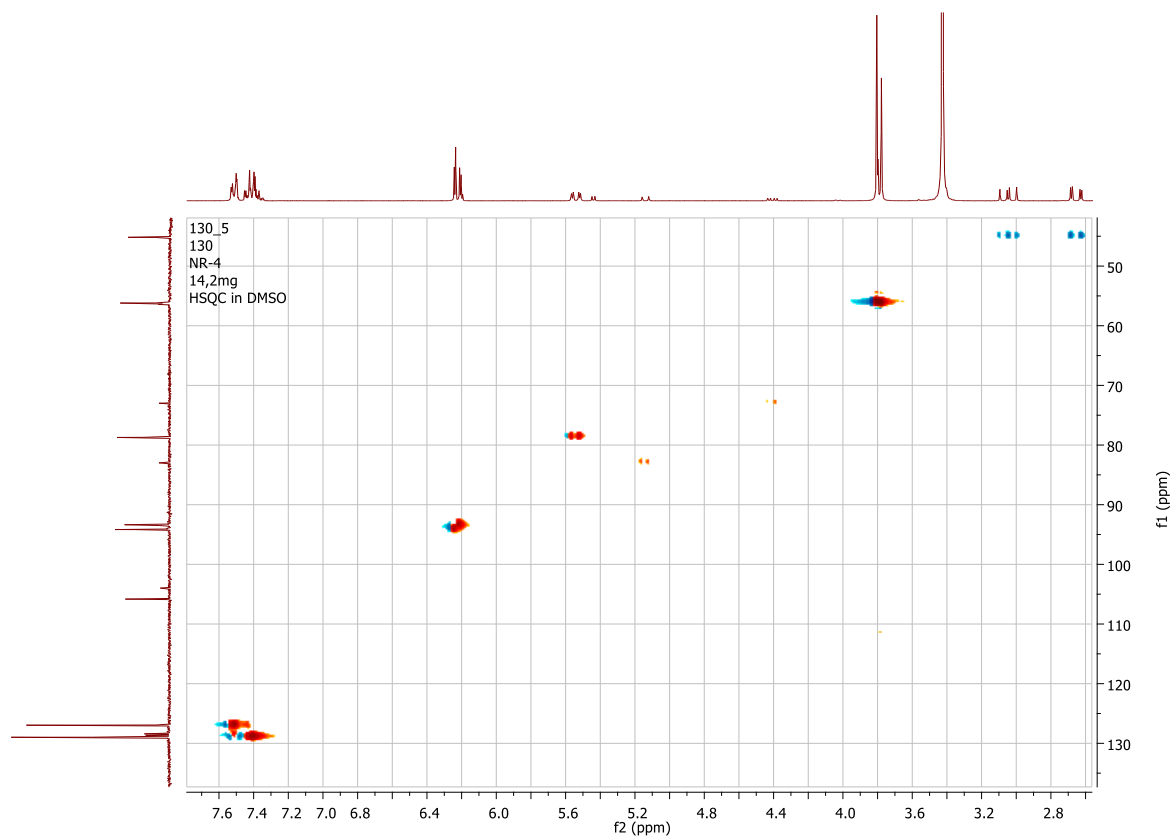

**Figure S15.** HMBC NMR spectrum (300 and 150.09 MHz) of Compound 2, peak 48, 5,3'-dihydroxy-4',7-dimethoxyflavanone.

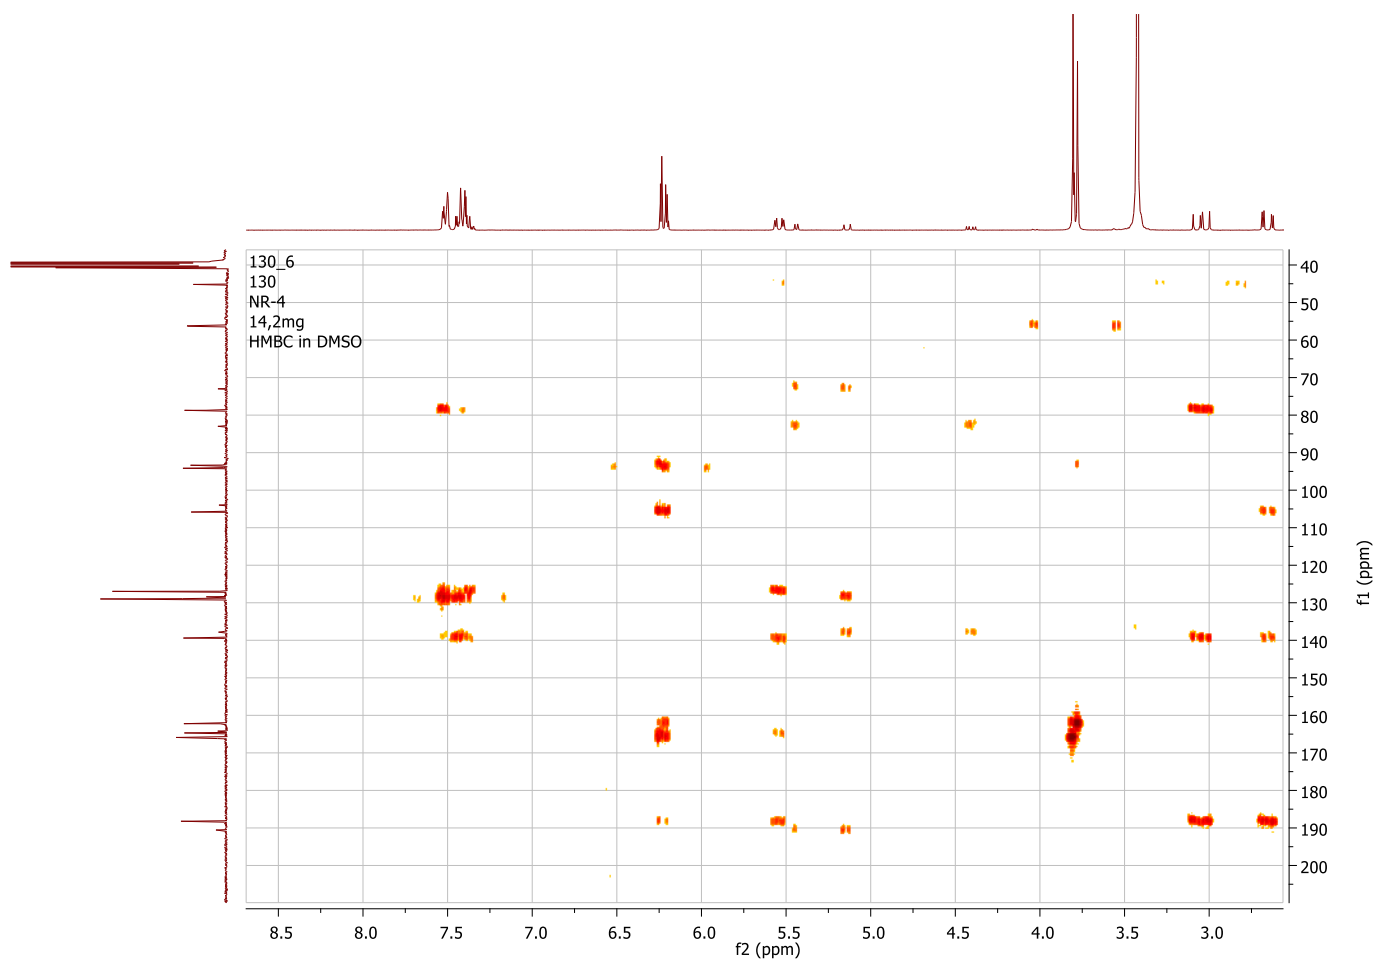

Figure S16. <sup>1</sup>H NMR (300 MHz) spectrum of Compound 3, peak 41, 5-hydroxy-3,4',7-trimethoxyflavone .

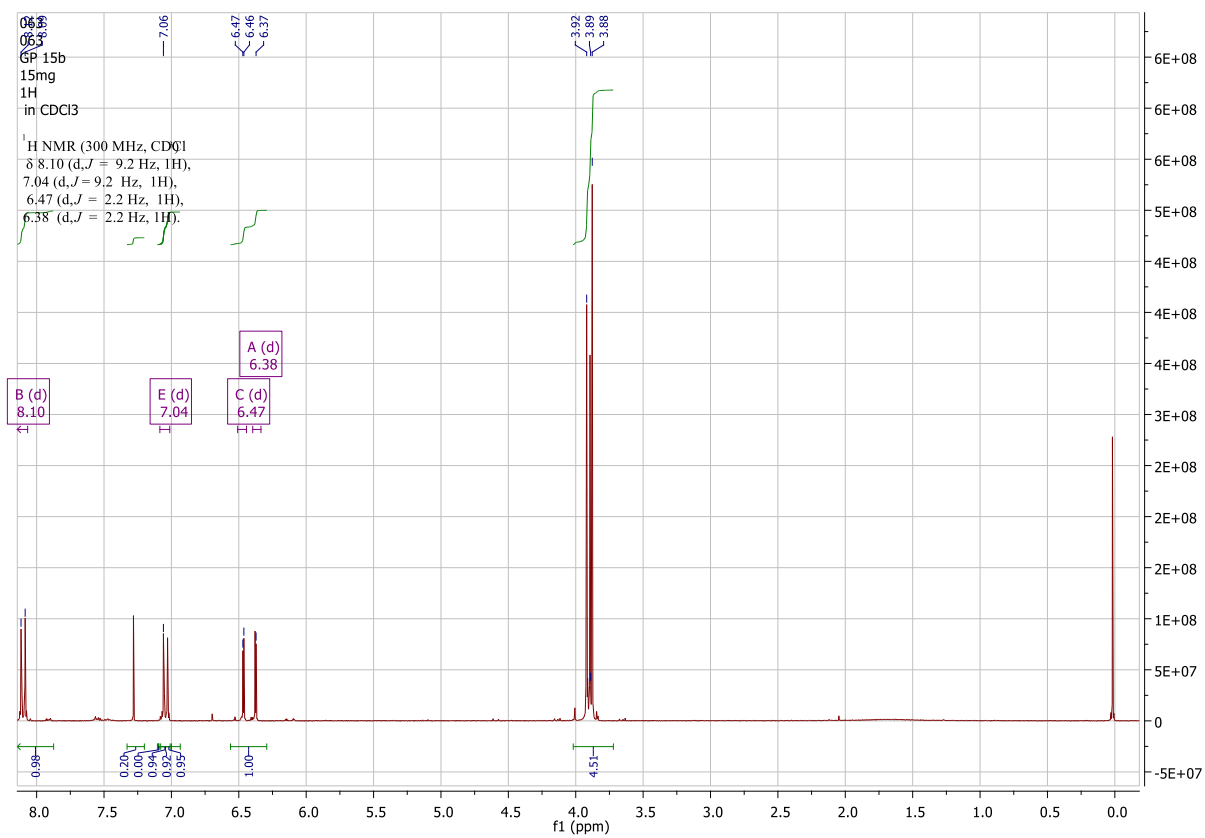

Figure S17. <sup>1</sup>H NMR (300 MHz) spectrum of Compound 3, peak 41, 5-hydroxy-3,4',7-trimethoxyflavone (Ampliation).

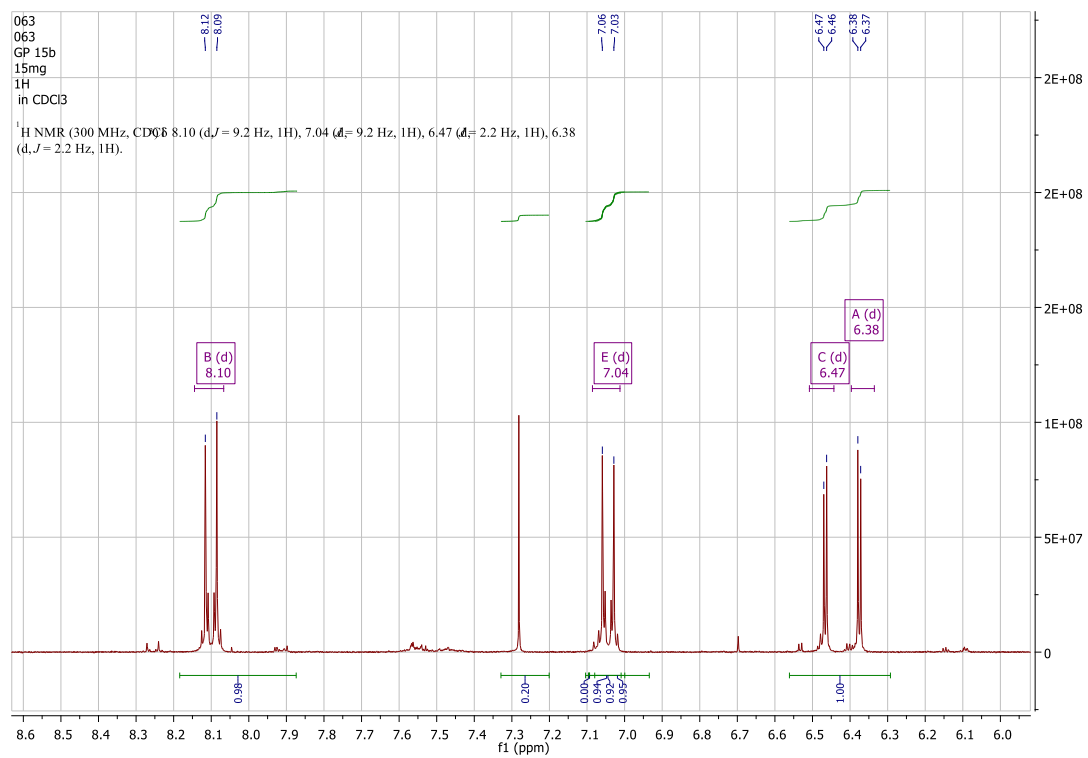

Figure S18.  $^{13}\text{C}$  NMR spectrum (150.09 MHz) of Compound 3, peak 41, 5-hydroxy-3,4',7-trimethoxyflavone.

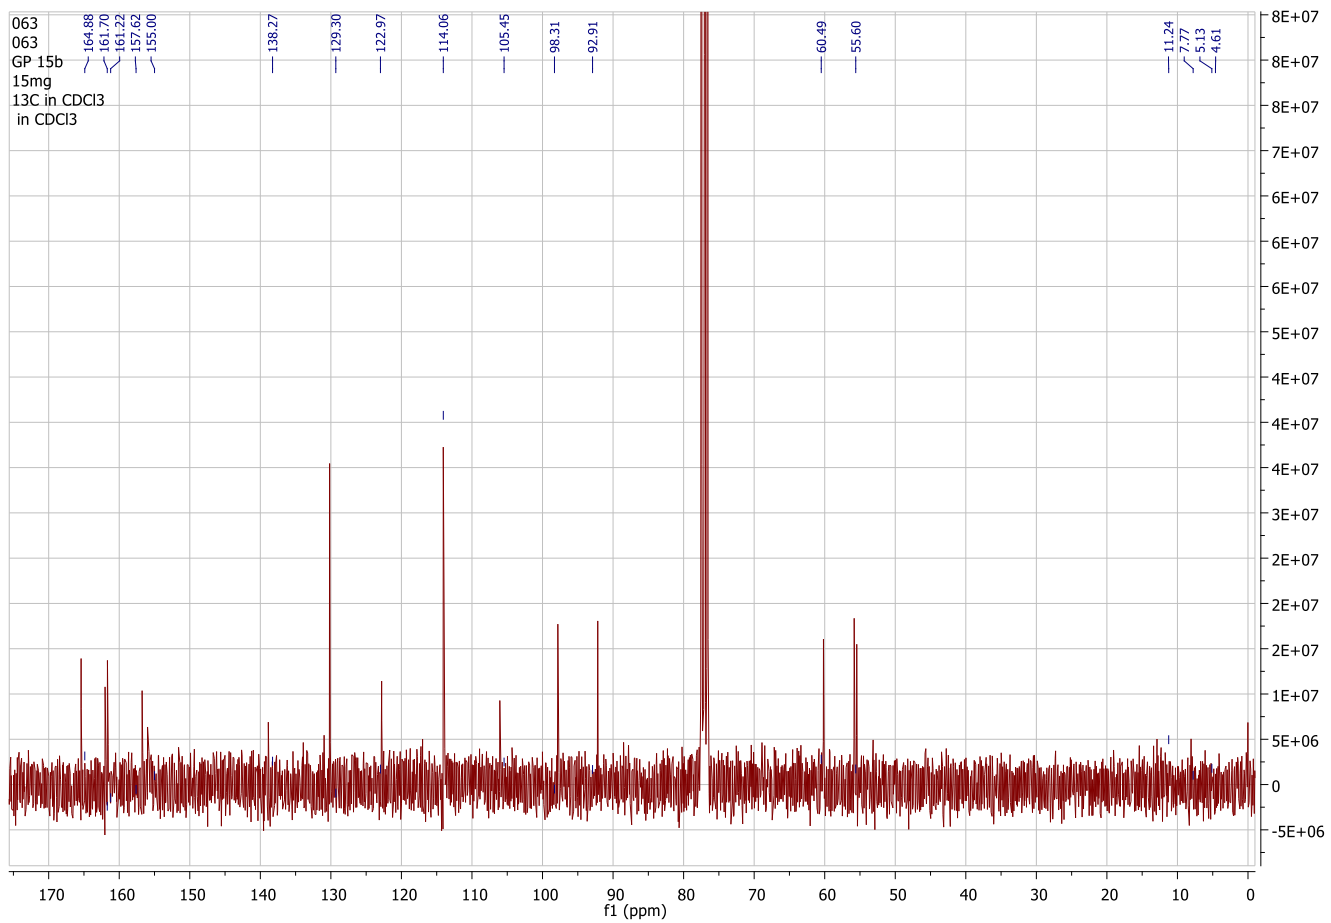

**Figure S19.** DEPT 135 NMR spectrum (150.09 MHz) of Compound 3, peak 41, 5-hydroxy-3,4',7-trimethoxyflavone.

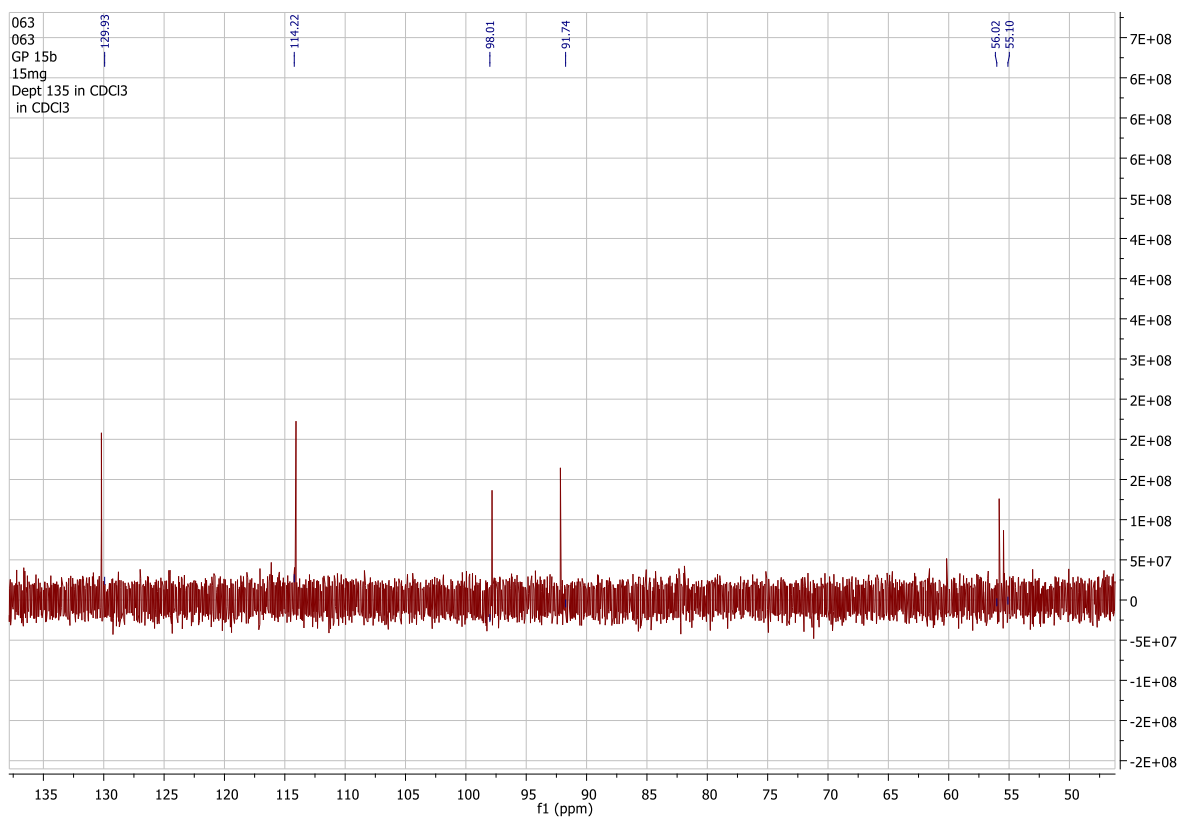



Figure S20. HSQC NMR spectrum (300 and 150.09 MHz) of Compound 3, peak 41, 5-hydroxy-3,4',7-trimethoxyflavone.

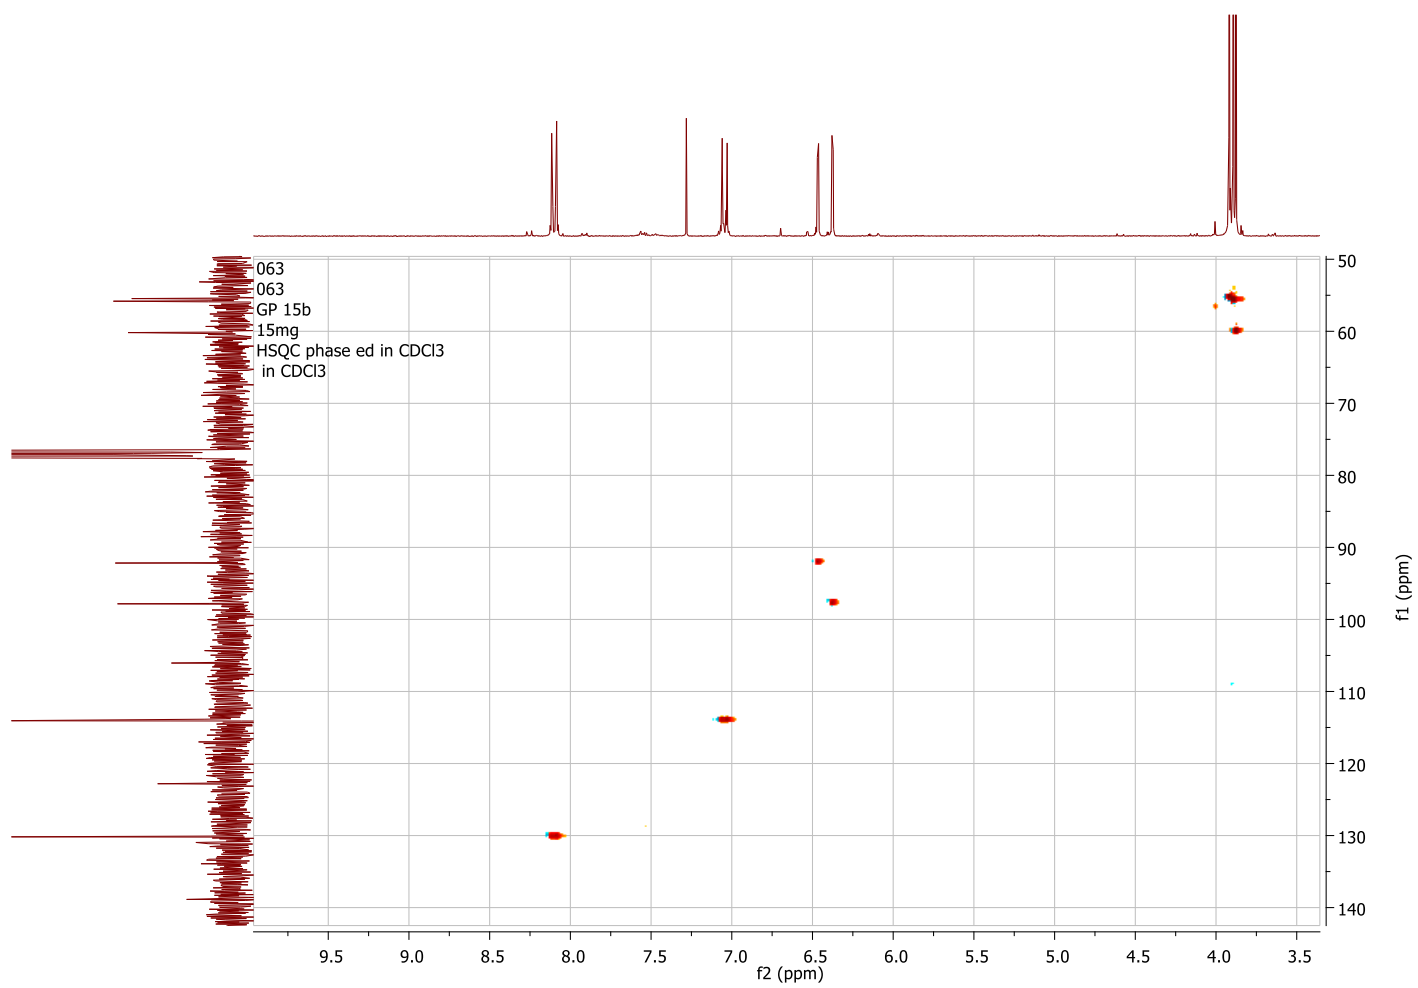

Figure S21. <sup>1</sup>H NMR (300 MHz) spectrum of compound Compound 4, peak 47, 3-acetyl-5-hydroxy-7-methoxyflavanone.

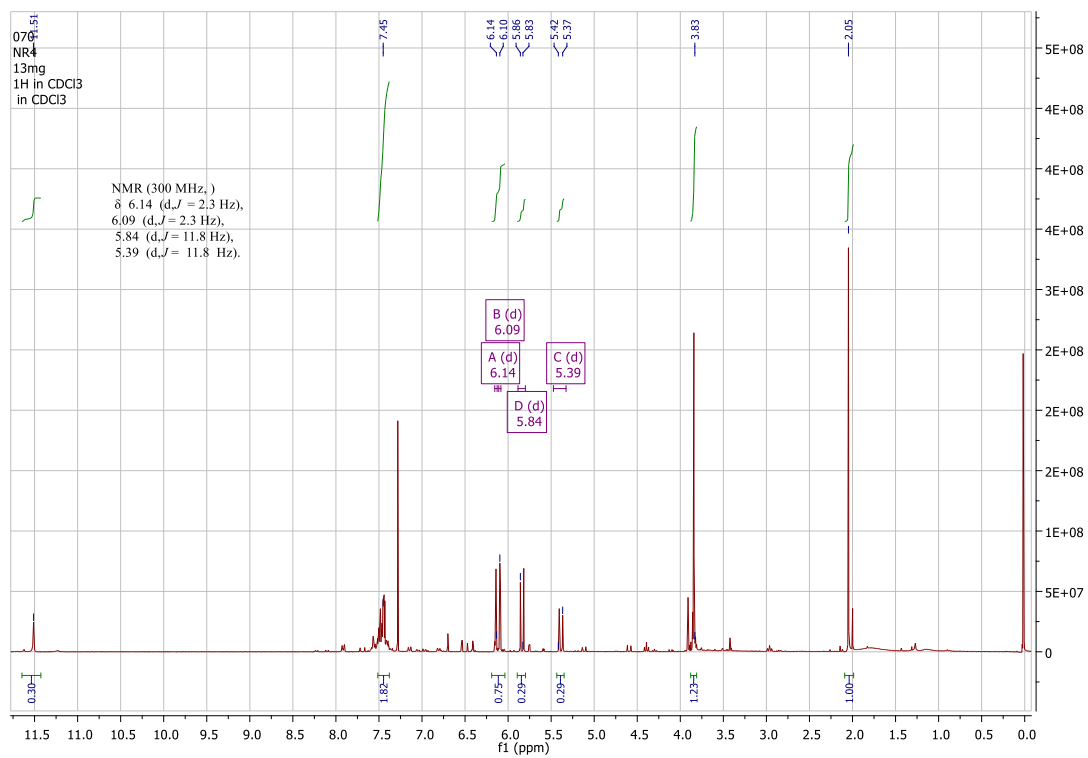

Figure S22. <sup>13</sup>C NMR spectrum (150.09 MHz) of Compound 4, peak 47, 3-acetyl-5-hydroxy-7-methoxyflavone.

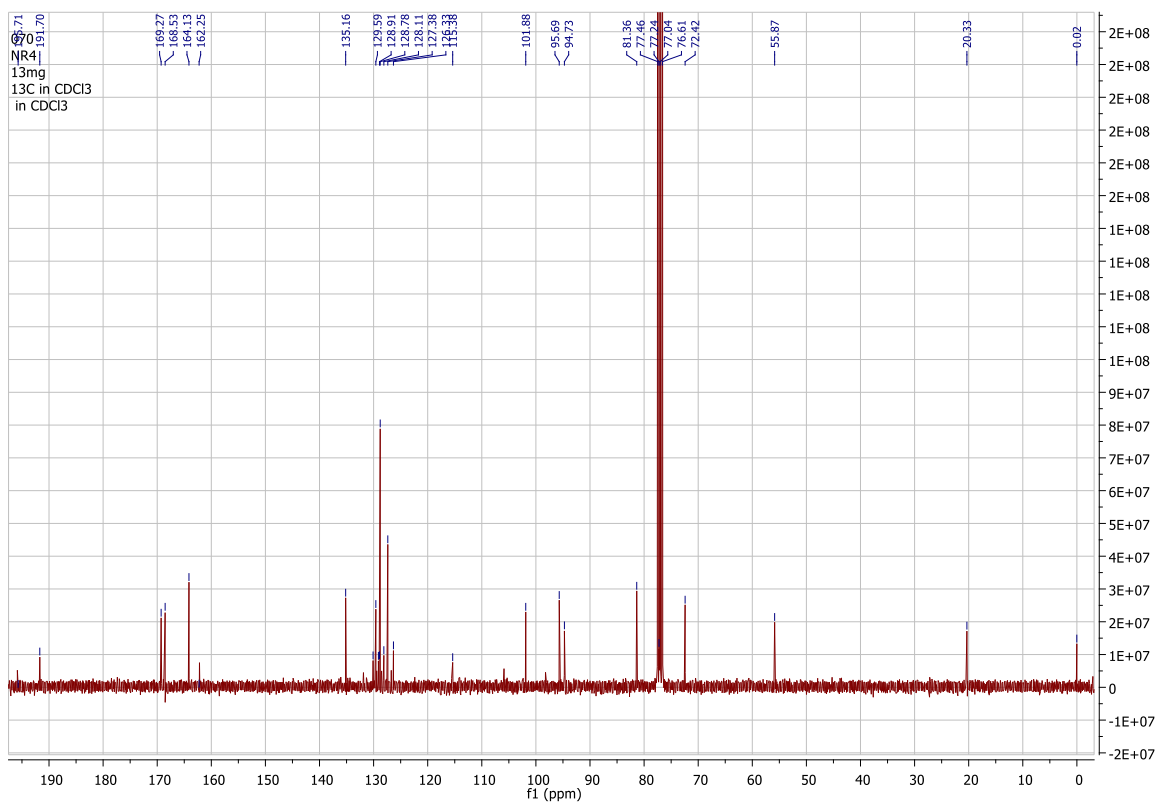

Figure S23. DEPT 135 NMR spectrum (150.09 MHz) of Compound 4, peak 47, 3-acetyl-5-hydroxy-7-methoxyflavanone.

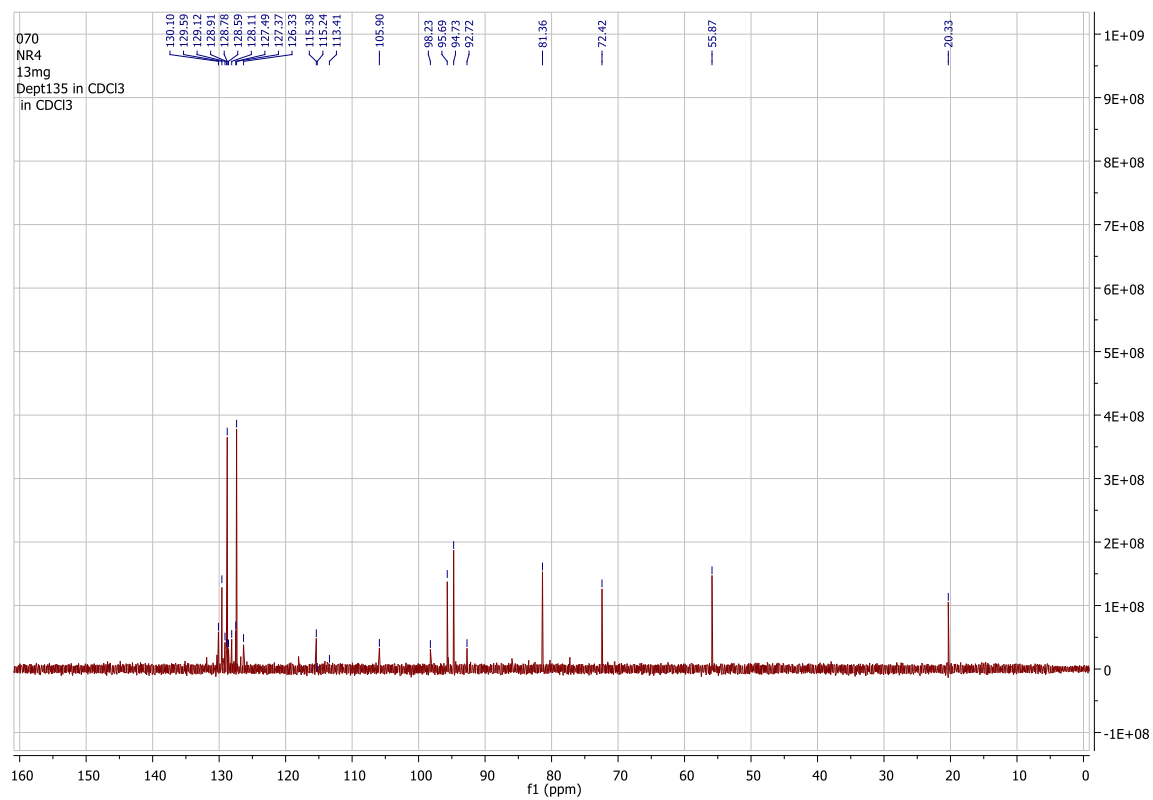

**Figure S24.**  $^1\text{H}$ - $^1\text{H}$ -COSY NMR spectrum (300 MHz) of Compound 4, peak 47, 3-acetyl-5-hydroxy-7-methoxyflavanone.

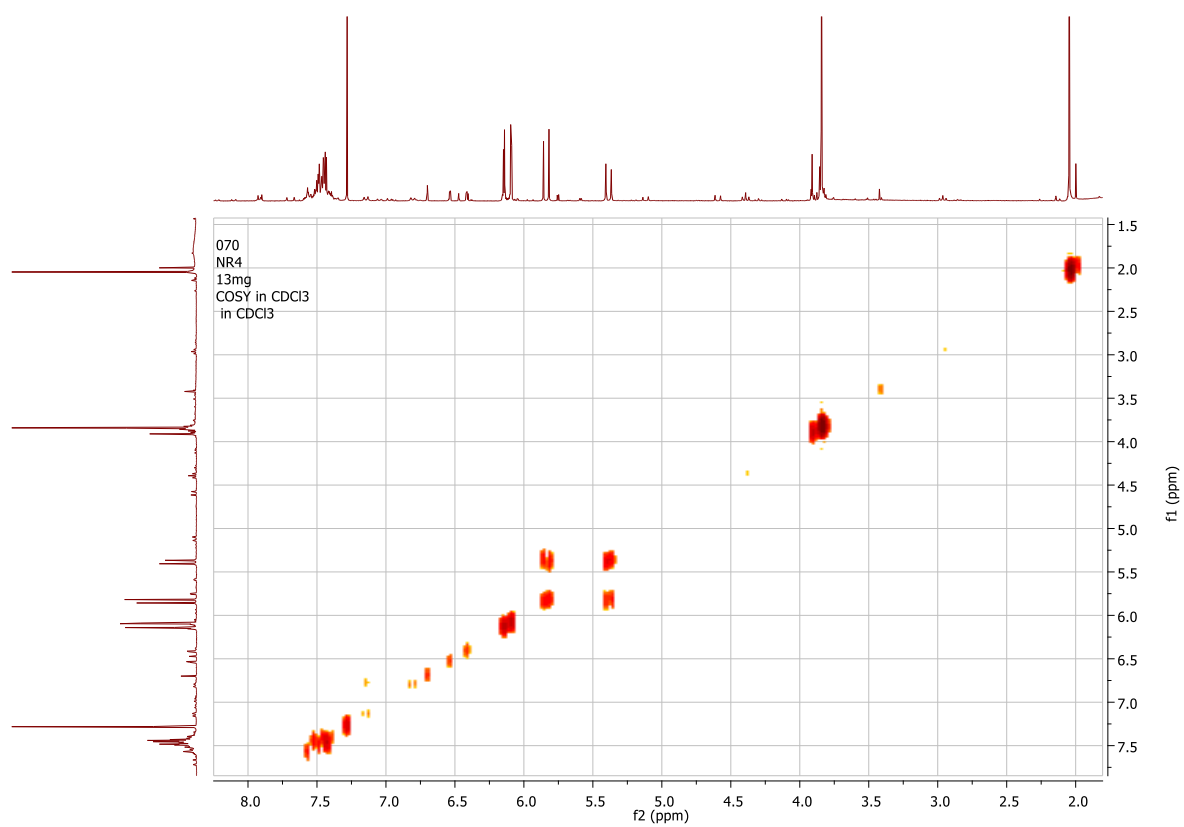



**Figure S26.** Phase edited HMBC NMR spectrum (300 and 150.09 MHz) of Compound 4, peak 47, 3-acetyl-5-hydroxy-7-methoxyflavanone.

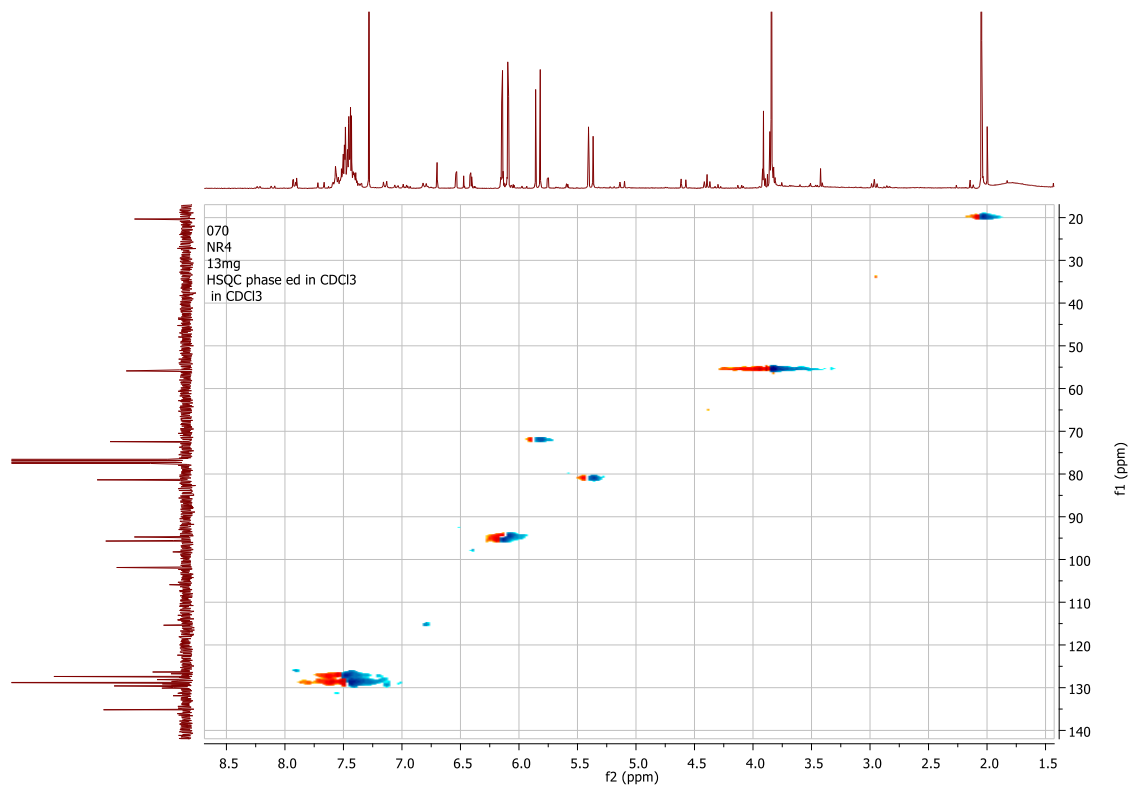

Figure S27.  $^1\text{H}$  NMR (300 MHz) spectrum of Compound 5, peak 49, 5-hydroxy-7-methoxyflavanone (pinostrobin).

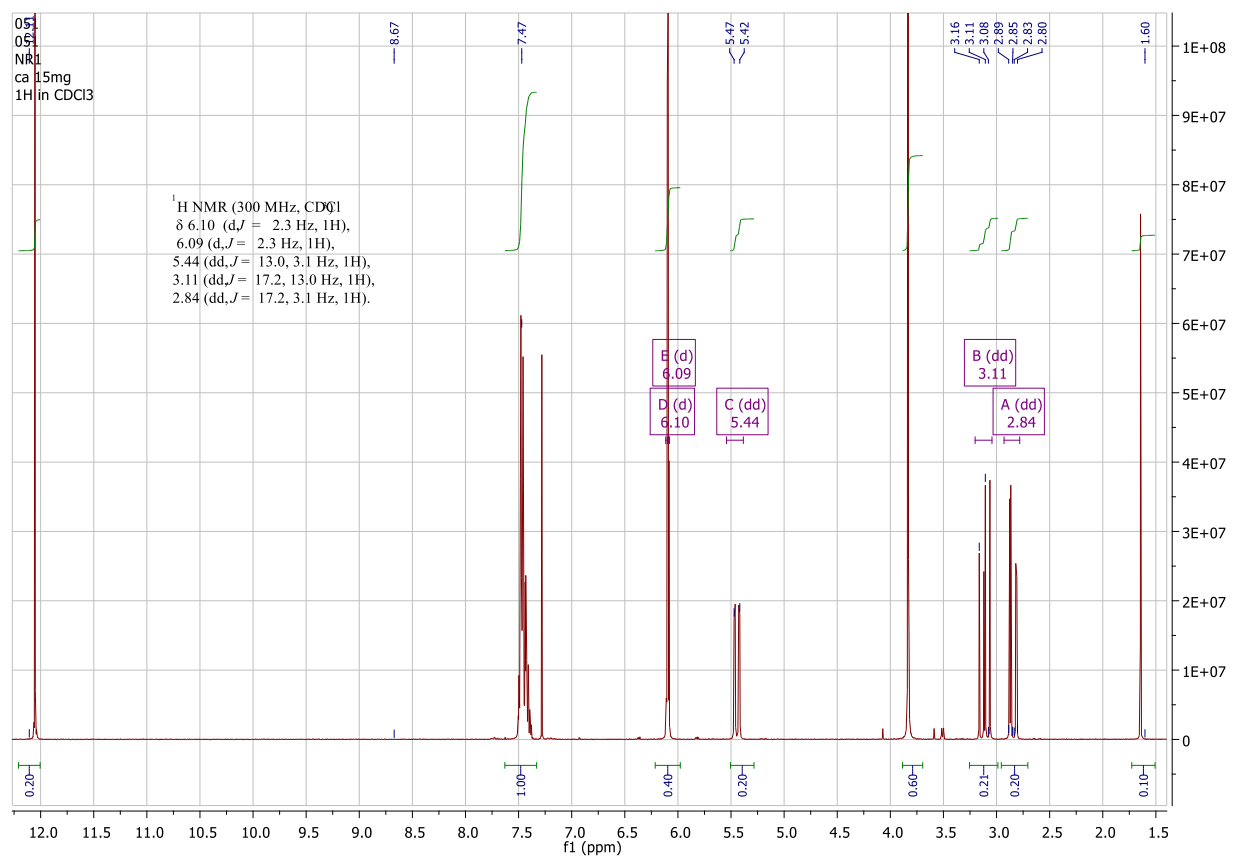



**Figure S28.**  $^1\text{H}$  NMR (300 MHz) spectrum of Compound 5, peak 49, 5-hydroxy-7-methoxyflavanone (pinostrobin). (Ampliation).

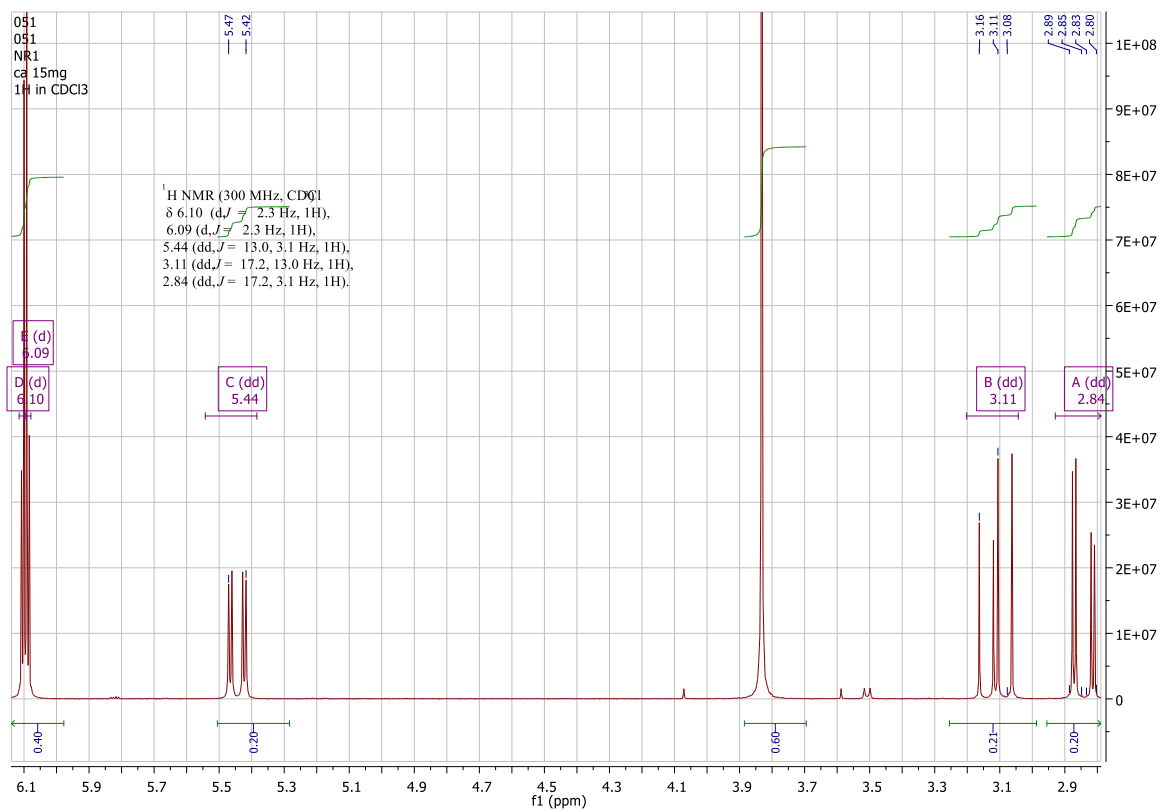

Figure S29. C NMR spectrum (150.09 MHz) of Compound 5, peak 49, 5-hydroxy-7-methoxyflavanone (pinostrobin).

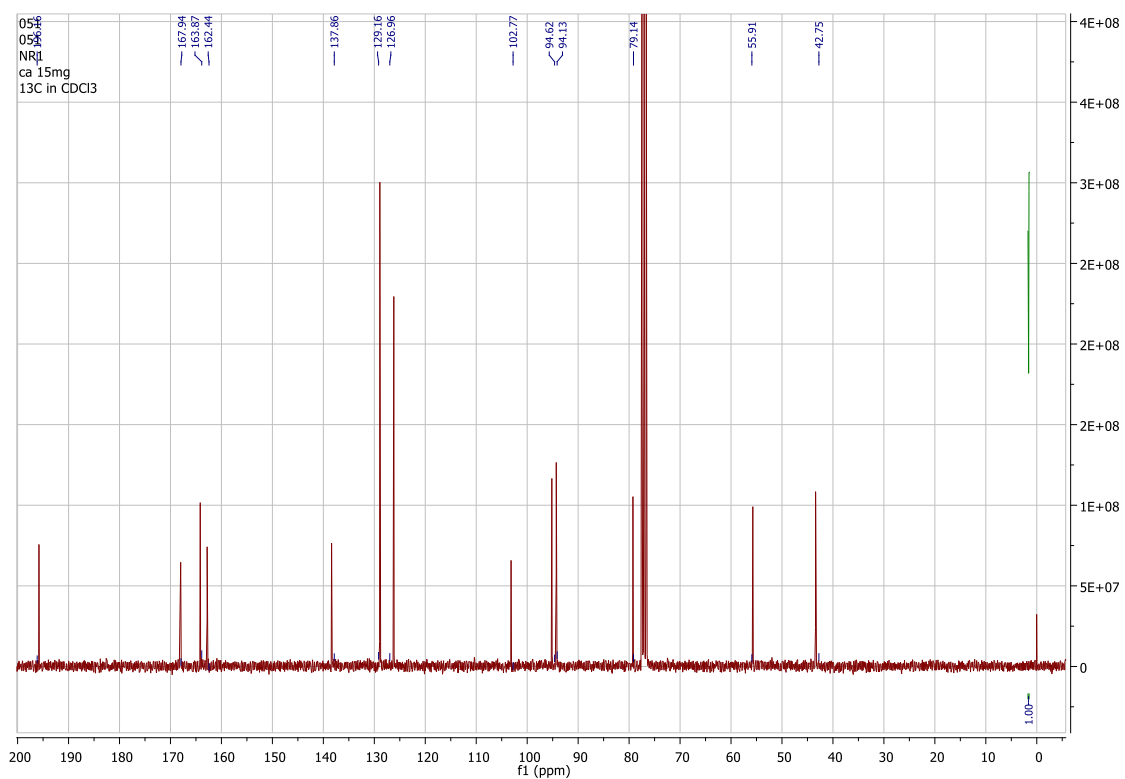

Figure 30. DEPT 135 NMR spectrum (150.09 MHz) of Compound 5, peak 49, 5-hydroxy-7-methoxyflavanone (pinostrobin).

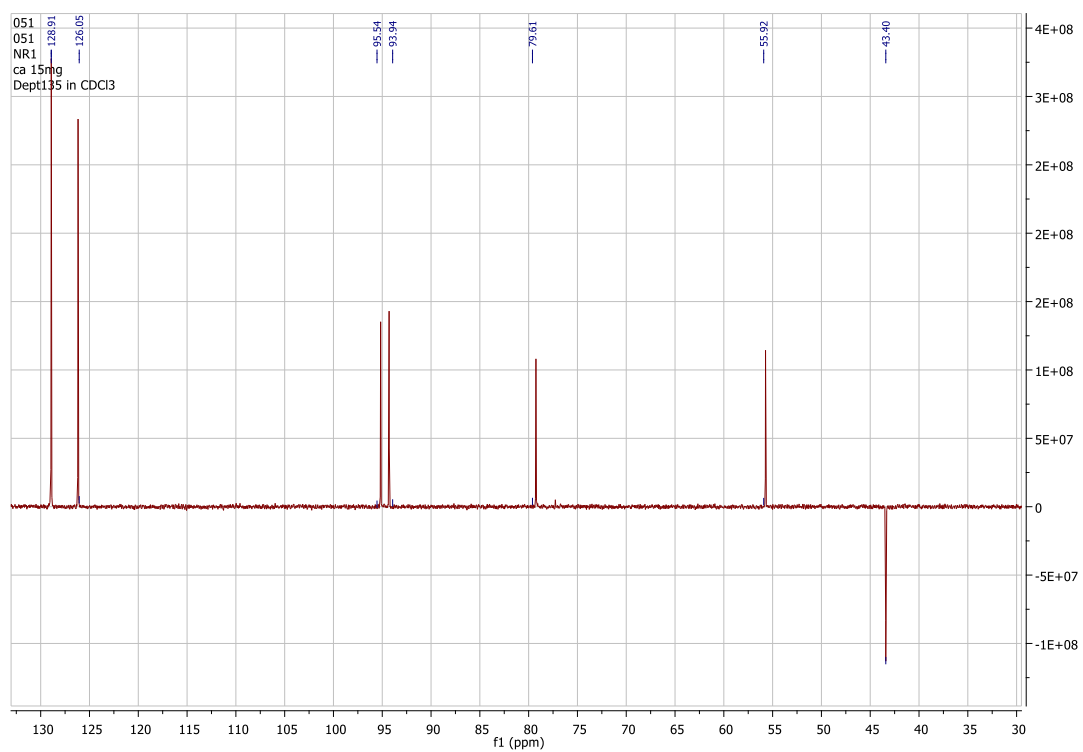

**Figure S31.** Phase edited HSQC NMR spectrum (300 and 150.09 MHz) of Compound 5, peak 49, 5-hydroxy-7-methoxyflavanone (pinostrobin).

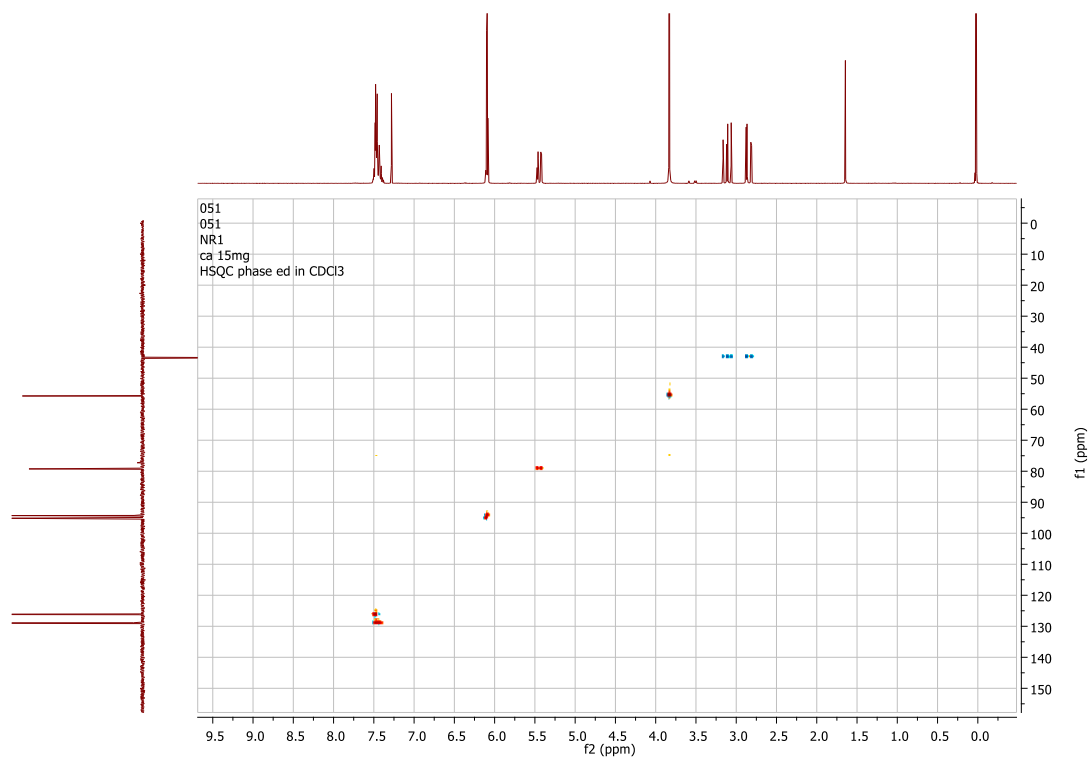

**Figure S32.** Phase edited HMBC NMR spectrum (300 and 150.09 MHz) of Compound 5, peak 49, 5-hydroxy-7-methoxyflavanone (pinostrobin).

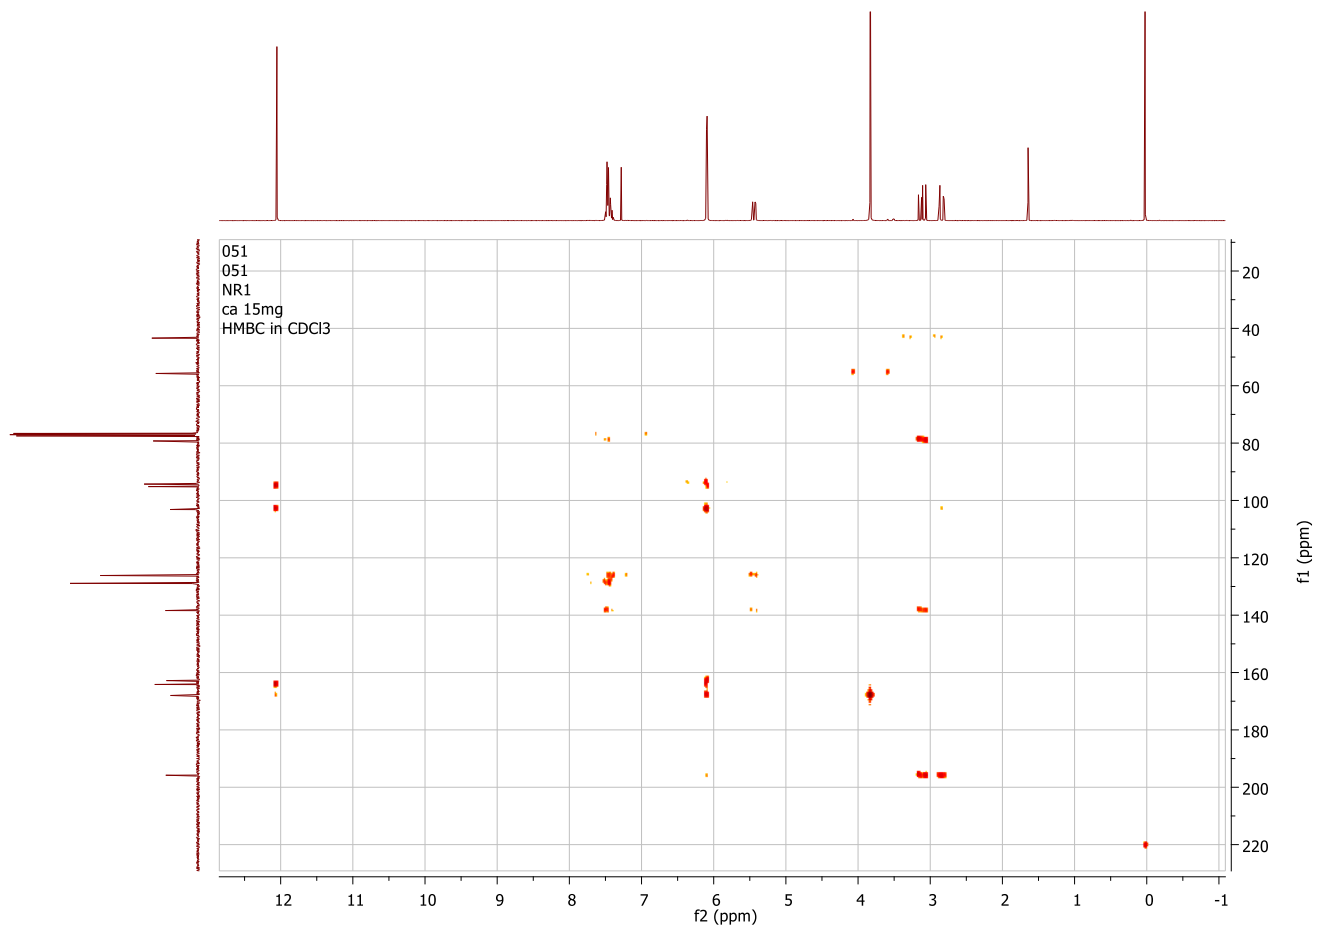

Supplement: molecules-25-00520-s001.pdf [file molecules-25-00520-s001.pdf]
